# Supplementary material
Source: PubMed Central journal article supplement (PMC5039033)
Supplement: NIHMS813048-supplement-Sup__Table_1.pdf [file NIHMS813048-supplement-Sup__Table_1.pdf]

## **Acta Neuropathologica**

### **Germline and somatic FGFR1 abnormalities in dysembryoplastic neuroepithelial tumors**

Barbara Rivera<sup>1,2</sup> · Tenzin Gayden<sup>2</sup> · Jian Carrot-Zhang<sup>2,3</sup> · Javad Nadaf<sup>2,3</sup> · Talia Boshari<sup>4</sup> · Damien Faury<sup>2</sup> · Michele Zeinieh<sup>2</sup> · Romeo Blanc<sup>5</sup> · David L. Burk<sup>6</sup> · Somayyeh Fahiminiya<sup>2,3</sup> · Eric Bareke<sup>2,3</sup> · Ulrich Schüller<sup>7</sup> · Camelia M. Monoranu,<sup>8</sup> Ronald Sträter<sup>9</sup> · Kornelius Kerl<sup>9</sup> · Thomas Niederstadt<sup>10</sup> · Gerhard Kurlemann<sup>11</sup> · Benjamin Ellezam<sup>12</sup> · Zuzanna Michalak<sup>13,14</sup> · Maria Thom<sup>13,14</sup> · Paul J. Lockhart<sup>15,16</sup> · Richard J. Leventer<sup>15,17,18</sup> · Milou Ohm<sup>19</sup> · Duncan MacGregor<sup>20</sup> · David Jones<sup>21,22</sup> · Jason Karamchandani<sup>23</sup> · Celia MT Greenwood<sup>2,24</sup> · Albert M. Berghuis<sup>6</sup> · Susanne Bens<sup>25</sup> · Reiner Siebert<sup>25</sup> · Magdalena Zakrzewska<sup>26</sup> · Pawel P. Liberski<sup>26</sup> · Krzysztof Zakrzewski<sup>27</sup> · Sanjay M. Sisodiya<sup>14,28</sup> · Werner Paulus<sup>29</sup> · Steffen Albrecht<sup>30</sup> · Martin Hasselblatt<sup>29</sup> · Nada Jabado<sup>2,31</sup> · William D Foulkes<sup>1,2,4,32</sup> · Jacek Majewski<sup>2,3</sup>

<sup>1</sup>Program in Cancer Genetics, Department of Oncology and Human Genetics, McGill University, Montreal, Quebec, Canada

<sup>2</sup>Department of Human Genetics, McGill University, Montreal, Quebec, Canada

<sup>3</sup>McGill University and Génome Québec Innovation Centre, Montreal, Quebec, Canada; <sup>4</sup>Department of Medical Genetics, Lady Davis Institute and Segal Cancer Centre, Jewish General Hospital, McGill University, Montreal, Quebec, Canada.

<sup>5</sup>Bloomfield Center for Research on Aging, Lady Davis Institute for Medical Research, McGill University, Jewish General Hospital, Montréal, Quebec, Canada

<sup>6</sup>Department of Biochemistry and Groupe de Recherche Axé sur la Structure des Protéines, McGill University, Montreal, Quebec, Canada

<sup>7</sup>Center for Neuropathology, Ludwig-Maximilians-University, Munich, Germany

<sup>8</sup>Department of Neuropathology, Institute of Pathology, University of Würzburg, Comprehensive Cancer Center Mainfranken, Würzburg, Germany

<sup>9</sup>Pediatric Hematology and Oncology, University Children's Hospital Münster, Münster, Germany

- <sup>10</sup>Department of Radiology, University Hospital Münster, Münster, Germany
- <sup>11</sup>Division of Pediatric Neurology, University Children's Hospital, Münster, Germany
- <sup>12</sup>Department of Pathology, CHU Sainte-Justine, Montreal, Canada
- <sup>13</sup>Division of Neuropathology, UCL Institute of Neurology, London, UK
- <sup>14</sup>Department of Clinical and Experimental Epilepsy, UCL Institute of Neurology, London, UK
- <sup>15</sup>Department of Pediatrics, The University of Melbourne, Melbourne, Australia
- <sup>16</sup>Bruce Lefroy Centre for Genetic Health Research, Murdoch Childrens Research Institute, Melbourne, Australia
- <sup>17</sup>Department of Neurology, The Royal Children's Hospital, Melbourne, Australia
- <sup>18</sup>Murdoch Childrens Research Institute, Melbourne, Australia
- <sup>19</sup>VUMC School of Medical Sciences, Amsterdam, The Netherlands
- <sup>20</sup>Department of Anatomical Pathology, Royal Children's Hospital, Melbourne, Australia; <sup>21</sup>German Cancer Consortium (DKTK), German Cancer Research Center (DKFZ), Heidelberg, Germany
- <sup>22</sup>Division of Pediatric Neurooncology (B062), German Cancer Research Center (DKFZ), Heidelberg, Germany
- <sup>23</sup>Department of Pathology, McGill University, Montreal Neurological Institute, Montreal, Quebec, Canada
- <sup>24</sup>Departments of Oncology and Epidemiology, Biostatistics & Occupational Health, McGill University, Montreal, Quebec, Canada
- <sup>25</sup>Institute of Human Genetics, Christian-Albrechts-University Kiel & University Hospital Schleswig-Holstein, Campus Kiel, Kiel, Germany
- <sup>26</sup>Department of Molecular Pathology and Neuropathology, Medical University of Lodz, Lodz, Poland
- <sup>27</sup>Department of Neurosurgery, Polish Mother's Memorial Hospital Research Institute, Lodz, Poland
- <sup>28</sup>Epilepsy Society, Bucks, UK
- <sup>29</sup>Institute of Neuropathology, University Hospital Münster, Münster, Germany
- <sup>30</sup>Department of Pathology, Montreal Children's Hospital, McGill University Health Centre, McGill University, Montreal, Quebec, Canada

<sup>31</sup>Department of Pediatrics, Montreal Children's Hospital, McGill University Health Centre, Montreal, Quebec, Canada

<sup>32</sup>Department of Medical Genetics and Cancer Research Program, Research Institute McGill University Health Centre, Montreal, Quebec, Canada

Correspondence to: Martin Hasselblatt, William D Foulkes or Jacek Majewski

[martin.hasselblatt@ukmuenster.de](mailto:martin.hasselblatt@ukmuenster.de), [william.foulkes@mcgill.ca](mailto:william.foulkes@mcgill.ca), [jacek.majewski@mcgill.ca](mailto:jacek.majewski@mcgill.ca)

**Suppl. Table 1 Complete series of cases in the study and their diagnoses, age, sex, and location**

| Case | Diagnosis (dx)        | Sex    | Age | Location                    | Mutation Status                    | Clinical Details and Outcome                | Comments                     |
|------|-----------------------|--------|-----|-----------------------------|------------------------------------|---------------------------------------------|------------------------------|
| 1    | DNET                  | female | 49  | Temporo-mesial              | -                                  | Complex-focal seizures since several years  |                              |
| 2    | DNET                  | male   | 17  | Temporal                    | -                                  | Focal seizures                              |                              |
| 3    | DNET                  | male   | 27  | Midline (septum pellucidum) | <i>FGFR1</i> full gene duplication | -                                           |                              |
| 4    | DNET                  | male   | 21  | R, Temporo-frontal          | p.K656D                            | Complex-focal seizure                       |                              |
| 5    | DNET                  | female | 38  | R, Temporal                 | TKD                                | Generalized seizures                        |                              |
| 6    | DNET                  | male   | 42  | R, Temporo-mesial           | p.K656E                            | Complex-focal seizures since several years  |                              |
| 7    | DNET                  | male   | 26  | R, Temporo-parietal         | p.N546K                            | Seizures                                    |                              |
| 8    | DNET                  | female | 43  | R, Temporo-mesial           | TKD                                | Reported recurrence                         | Recurrence sample            |
| 9    | DNET                  | male   | 18  | R, Parietal                 | p.K656E+ p.K655V                   | Incidental finding after accident           |                              |
| 10   | DNET                  | male   | 12  | R, Parietal                 | p.K656E+p.E633A+ p.D652G+p.A640A   | Seizures, reported recurrence               |                              |
| 11*  | DNET                  | male   | 12  | R, Parietal                 | p.K656E+p.E633A+ p.D652G+p.A640A   | -                                           | Recurrence sample of case 10 |
| 12   | Unclear               | female | 9   | Parietal                    | -                                  | -                                           |                              |
| 13   | Pilocytic astrocytoma | female | 23  | Parieto-occipital           | -                                  | Single seizure                              |                              |
| 14   | DNET                  | male   | 8   | L, Temporal                 | TKD                                | Daily seizures in the early morning         |                              |
| 15   | DNET                  | male   | 14  | R, Occipital                | TKD                                | Seizures with visual hallucinations         |                              |
| 16   | DNET                  | male   | 30  | L, Frontal                  | p.K656D                            | Seizures                                    |                              |
| 17   | DNET                  | male   | 11  | L, Temporal                 | -                                  | Generalized seizures                        |                              |
| 18   | DNET                  | male   | 6   | R, Frontal                  | TKD                                | Complex-focal seizures since several weeks  |                              |
| 19   | DNET                  | female | 18  | R, Frontal                  | <i>FGFR1-TACCD1</i> fusion         |                                             |                              |
| 20   | DNET                  | female | 1mo | L, Temporal                 | <i>FGFR1</i> breakpoint            | Complex-focal seizures since 4 weeks of age |                              |
| 21   | Unclear               | male   | 8   | R, Parietal                 | -                                  | Seizures                                    |                              |

| Case | Diagnosis (dx)         | Sex    | Age | Location             | Mutation Status                | Clinical Details and Outcome                                                                             | Comments                     |
|------|------------------------|--------|-----|----------------------|--------------------------------|----------------------------------------------------------------------------------------------------------|------------------------------|
| 22   | DNET                   | male   | 11  | R, Occipital         | -                              | Seizures                                                                                                 |                              |
| 23   | DNET                   | male   | 13  | L, Temporal          | <i>FGFR1</i> breakpoint        | -                                                                                                        |                              |
| 24   | Low grade glioma       | male   | 2   | L, Temporal          | BRAF p.V600E                   | -                                                                                                        |                              |
| 25   | DNET                   | male   | 2   | L, Temporal          | -                              | Seizures since 2 y/o                                                                                     |                              |
| 26   | Unclear                | male   | 31  | R, Temporal          | p.K656E                        | Seizures                                                                                                 |                              |
| 27   | DNET                   | male   | 1   | L, Temporal          | -                              | Absence seizures & complex-focal seizures since several months                                           |                              |
| 28   | Unclear                | female | 3mo | R, Temporal          | -                              | Seizures since 3mo of age                                                                                |                              |
| 29   | DNET                   | female | 43  | R, Temporo-mesial    | -                              | Seizures                                                                                                 |                              |
| 30   | Low grade glioma       | male   | 4mo | R, Frontal           | -                              | Seizures since 4mo of age, no recurrence at 4-yr F/U                                                     |                              |
| 31   | Oligodendroglial tumor | female | 1.5 | R, Temporal          | -                              | Generalized seizures since 18 mo of age, no recurrence at 1-yr F/U                                       |                              |
| 32   | DNET                   | female | 12  | L, Temporo-mesial    | p.K656E; p.K655I               | Seizures, recurrence at 5-yr F/U                                                                         |                              |
| 33*  | DNET                   | female | 17  | L, Temporo-mesial    | p.K656E; p.K655I               | Seizures, no recurrence at 1-yr F/U                                                                      | Recurrence sample of case 32 |
| 34   | DNET                   | female | 20  | R, Temporal          | -                              | Seizures                                                                                                 |                              |
| 35   | DNET                   | female | 28  | R, Fronto-temporal   | -                              | Seizures, no recurrence at 3-yr F/U                                                                      |                              |
| 36   | DNET                   | male   | 5   | L, Temporo-mesial    | p.K656D                        | Generalized seizures since 5 y/o, no recurrence at 1-yr F/U                                              |                              |
| 37   | DNET                   | male   | 11  | L, Temporal          | -                              | Absence seizures                                                                                         |                              |
| 38   | DNET                   | male   | 13  | R, Temporal          | p.N546K                        | Complex-focal seizures with aura since 13 y/o, recurrence at 4-yr F/U, 1 yr after no evidence of disease |                              |
| 39   | Oligodendroglial tumor | female | 12  | Temporal             | -                              | No recurrence at 2-mo F/U                                                                                |                              |
| 40   | Unclear                | female | 38  | -                    | N546K+ <i>FGFR1</i> breakpoint | -                                                                                                        |                              |
| 41   | Cortical dysplasia     | female | 18  | L, Anterior temporal | -                              | -                                                                                                        |                              |
| 42   | Unclear                | female | 20  | L, Frontal operculum | p.K656E+p.D652G                | Reported recurrence                                                                                      | Low tumor content            |
| 43   | Ganglioglioma          | male   | 5   | L, Parieto-occipital | -                              | -                                                                                                        |                              |

| Case | Diagnosis (dx)           | Sex    | Age   | Location             | Mutation Status         | Clinical Details and Outcome                        | Comments                                                 |
|------|--------------------------|--------|-------|----------------------|-------------------------|-----------------------------------------------------|----------------------------------------------------------|
| 44   | Pilocytic astrocytoma    | female | 3mo   | L, Frontal           | -                       | Reported recurrence as PA                           | Low tumor content                                        |
| 45*  | Pilocytic astrocytoma    | female | 3mo   | L, Frontal           | TKD                     | -                                                   | Recurrence sample of case 44                             |
| 46   | Diffuse astrocytic tumor | female | 6days | L, Temporal          | -                       | -                                                   |                                                          |
| 47   | Unclear                  | male   | 2     | R, Temporal          | -                       | -                                                   |                                                          |
| 48   | Unclear                  | male   | 1     | R, Temporal          | <i>FGFR3-TACCD3</i>     | -                                                   |                                                          |
| 49   | Unclear                  | male   | 12    | L, Temporal          | -                       | -                                                   |                                                          |
| 50   | DNET                     | female | 1     | R, Occipital         | TKD                     | -                                                   |                                                          |
| 51   | DNET                     | female | 4mo   | L, Frontal           | TKD                     | -                                                   |                                                          |
| 52   | DNET                     | female | 6mo   | R, Temporal          | TKD                     | Reported recurrence                                 |                                                          |
| 53   | Ganglioglioma            | female | 4mo   | L, Temporal          | -                       | -                                                   |                                                          |
| 54   | Unclear                  | male   | 6mo   | R, Temporal          | -                       | -                                                   |                                                          |
| 55   | DNET                     | male   | 2mo   | L, Temporal          | -                       | -                                                   |                                                          |
| 56   | Meningo-angiomas         | female | 5mo   | L, Parietal          | -                       | Reported recurrence                                 |                                                          |
| 57   | Unclear                  | male   | 8     | L, Temporal          | -                       | -                                                   |                                                          |
| 58   | Gliosis                  | male   | 6mo   | R, Temporal          | -                       | -                                                   | Low tumor content                                        |
| 59   | DNET                     | male   | 1mo   | R, Parieto-occipital | TKD                     | Reported recurrence                                 |                                                          |
| 60*  | DNET                     | male   | 14    | R, Parieto-occipital | TKD+ chromosomal 8 gain | -                                                   | Recurrence sample of case 59. See supplementary figure 4 |
| 61   | DNET                     | female | 1mo   | L, Frontal           | TKD                     | No recurrence reported                              |                                                          |
| 62   | DNET                     | female | 1mo   | R, Temporo-parietal  | TKD                     | -                                                   |                                                          |
| 63   | Unclear                  | male   | 2     | L, Temporal          | -                       | -                                                   |                                                          |
| 64   | Diffuse astrocytic tumor | male   | 4mo   | L, Fronto-parietal   | -                       | Reported recurrence & death with no further surgery |                                                          |
| 65   | Unclear                  | male   | 5     | L, Occipital         | -                       | -                                                   |                                                          |
| 66   | DNET                     | male   | 1mo   | R, Parieto-occipital | p.K656D                 | -                                                   |                                                          |

| Case | Diagnosis (dx)           | Sex    | Age | Location           | Mutation Status | Clinical Details and Outcome                              | Comments |
|------|--------------------------|--------|-----|--------------------|-----------------|-----------------------------------------------------------|----------|
| 67   | Diffuse astrocytic tumor | male   | 1mo | L, Fronto-parietal | -               | -                                                         |          |
| 68   | Diffuse astrocytic tumor | male   | 17  | Temporal           | p.K656D         | Residual tumor seen at 15-yr F/U MRI, no increase in size |          |
| 69   | Diffuse astrocytic tumor | male   | 31  | Temporal           | BRAF p.V600E    | -                                                         |          |
| 70   | Cortical dysplasia       | male   | 22  | Medial temporal    | BRAF p.V600E    | -                                                         |          |
| 71   | Unclear                  | female | 7   | Temporal           | BRAF p.V600E    | No recurrence at 12-yr F/U                                |          |
| 72   | DNET                     | female | 24  | Temporal           | -               | -                                                         |          |
| 73   | Unclear                  | male   | 30  | Temporal           | BRAF p.V600E    | -                                                         |          |
| 74   | Unclear                  | female | 21  | Temporal           | BRAF p.V600E    | No recurrence at 8-yr F/U MRI                             |          |
| 75   | Ganglioglioma            | female | 22  | Temporal           | -               | No recurrence at 1-yr F/U                                 |          |
| 76   | Ganglioglioma            | male   | 11  | Temporal           | -               | No recurrence at 7-yr F/U                                 |          |
| 77   | Ganglioglioma            | female | 7   | Temporal           | BRAF p.V600E    | -                                                         |          |
| 78   | Unclear                  | male   | 15  | Temporal           | -               | No recurrence at 1-yr F/U MRI                             |          |
| 79   | Unclear                  | male   | 36  | Temporal           | BRAF p.V600E    | No recurrence at 3.5-yr F/U                               |          |
| 80   | Unclear                  | male   | 6   | Temporal           | BRAF p.V600E    | Local F/U for 1.5 yrs, no recurrence                      |          |
| 81   | Unclear                  | male   | 3   | Temporal           | BRAF p.V600E    | No change on MRI at 6-yr post-op F/U                      |          |
| 82   | Unclear                  | female | 15  | Temporal           | -               | No recurrence after 6 yrs                                 |          |
| 83   | Ganglioglioma            | male   | 42  | Temporal           | -               | No recurrence at 3 yrs                                    |          |
| 84   | DNET                     | female | 16  | Frontal            | -               | No recurrence at 3-yr post-op F/U                         |          |
| 85   | Unclear                  | male   | 1   | Medial temporal    | -               | No recurrence at 4-yr F/U                                 |          |
| 86   | DNET                     | male   | 27  | Temporal           | -               | No recurrence at 4-yr F/U                                 |          |
| 87   | Pilocytic astrocytoma    | female | 31  | Temporal           | p.K656E         | No recurrence at 5-yr F/U                                 |          |
| 88   | Ganglioglioma            | male   | 4   | Frontal            | BRAF p.V600E    | No recurrence at 1-yr F/U                                 |          |
| 89   | Unclear                  | female | 8   | Medial temporal    | BRAF p.V600E    | No recurrence at 2.5-yr F/U MRI                           |          |
| 90   | Unclear                  | female | 21  | Temporal           | -               | No recurrence at 5-yr F/U MRI                             |          |
| 91   | DNET                     | female | 17  | Temporal           | -               | MRI scan 'stable' at 2.5-yr F/U                           |          |
| 92   | DNET                     | female | 23  | Temporal           | -               | No recurrence at 2-yr F/U MRI                             |          |

| Case | Diagnosis (dx) | Sex    | Age | Location                          | Mutation Status | Clinical Details and Outcome                                          | Comments          |
|------|----------------|--------|-----|-----------------------------------|-----------------|-----------------------------------------------------------------------|-------------------|
| 93   | Unclear        | male   | 42  | Temporal                          | -               | Seizure free; no recurrence at 1-yr post-op F/U                       |                   |
| 94   | Unclear        | male   | 32  | Temporal                          | -               | Seizure free after 3 yrs; no recurrence or residual tumor at 1-yr F/U | Low tumor content |
| 95   | DNET           | male   | 27  | Temporal                          | -               | No recurrence at 1-yr F/U MRI                                         |                   |
| 96   | DNET           | female | 45  | Parietal                          | -               | No recurrence at 1-yr F/U MRI; nocturnal seizures                     |                   |
| 97   | Unclear        | male   | 30  | Temporal                          | p.N546K         | -                                                                     |                   |
| 98   | Unclear        | female | 13  | L, Medial temporal                | p.N546 K        | Reported recurrence                                                   |                   |
| 99   | Unclear        | female | 12  | R, Parieto-occipital              | -               | No recurrence reported                                                |                   |
| 100  | Unclear        | female | 4   | Posterior insula, L temporal lobe | p.N546K+p.K656N | Reported recurrence                                                   |                   |

\*indicates recurrence of previous case

“F/U” = follow-up

Age indicated is first reported seizure or first reported tumor diagnosis, when the former data was unavailable

Age of relapse is age at which second tumor was diagnosed

"Unclear" used to designate cases in which the diagnosis remains unclear because (1) material is sparse, or (2) some elements of DNET (such as nodular growth) are present but no glioneuronal element is encountered, or (3) there is disagreement between pathologists and a more definite diagnosis would require an extensive immunohistochemical /molecular work-up, for which no material was available. For statistical purposes, these unclear diagnosis cases were all included in the non-DNET group.
