# Supplementary material
Source: PubMed Central journal article supplement (PMC5039033)
Supplement: NIHMS813048-supplement-Sup__Table_2.pdf [file NIHMS813048-supplement-Sup__Table_2.pdf]

## **Acta Neuropathologica**

### **Germline and somatic FGFR1 abnormalities in dysembryoplastic neuroepithelial tumors**

Barbara Rivera<sup>1,2</sup> · Tenzin Gayden<sup>2</sup> · Jian Carrot-Zhang<sup>2,3</sup> · Javad Nadaf<sup>2,3</sup> · Talia Boshari<sup>4</sup> · Damien Faury<sup>2</sup> · Michele Zeinieh<sup>2</sup> · Romeo Blanc<sup>5</sup> · David L. Burk<sup>6</sup> · Somayyeh Fahiminiya<sup>2,3</sup> · Eric Bareke<sup>2,3</sup> · Ulrich Schüller<sup>7</sup> · Camelia M. Monoranu,<sup>8</sup> Ronald Sträter<sup>9</sup> · Kornelius Kerl<sup>9</sup> · Thomas Niederstadt<sup>10</sup> · Gerhard Kurlemann<sup>11</sup> · Benjamin Ellezam<sup>12</sup> · Zuzanna Michalak<sup>13,14</sup> · Maria Thom<sup>13,14</sup> · Paul J. Lockhart<sup>15,16</sup> · Richard J. Leventer<sup>15,17,18</sup> · Milou Ohm<sup>19</sup> · Duncan MacGregor<sup>20</sup> · David Jones<sup>21,22</sup> · Jason Karamchandani<sup>23</sup> · Celia MT Greenwood<sup>2,24</sup> · Albert M. Berghuis<sup>6</sup> · Susanne Bens<sup>25</sup> · Reiner Siebert<sup>25</sup> · Magdalena Zakrzewska<sup>26</sup> · Pawel P. Liberski<sup>26</sup> · Krzysztof Zakrzewski<sup>27</sup> · Sanjay M. Sisodiya<sup>14,28</sup> · Werner Paulus<sup>29</sup> · Steffen Albrecht<sup>30</sup> · Martin Hasselblatt<sup>29</sup> · Nada Jabado<sup>2,31</sup> · William D Foulkes<sup>1,2,4,32</sup> · Jacek Majewski<sup>2,3</sup>

<sup>1</sup>Program in Cancer Genetics, Department of Oncology and Human Genetics, McGill University, Montreal, Quebec, Canada

<sup>2</sup>Department of Human Genetics, McGill University, Montreal, Quebec, Canada

<sup>3</sup>McGill University and Génome Québec Innovation Centre, Montreal, Quebec, Canada; <sup>4</sup>Department of Medical Genetics, Lady Davis Institute and Segal Cancer Centre, Jewish General Hospital, McGill University, Montreal, Quebec, Canada.

<sup>5</sup>Bloomfield Center for Research on Aging, Lady Davis Institute for Medical Research, McGill University, Jewish General Hospital, Montréal, Quebec, Canada

<sup>6</sup>Department of Biochemistry and Groupe de Recherche Axé sur la Structure des Protéines, McGill University, Montreal, Quebec, Canada

<sup>7</sup>Center for Neuropathology, Ludwig-Maximilians-University, Munich, Germany

<sup>8</sup>Department of Neuropathology, Institute of Pathology, University of Würzburg, Comprehensive Cancer Center Mainfranken, Würzburg, Germany

<sup>9</sup>Pediatric Hematology and Oncology, University Children's Hospital Münster, Münster, Germany

- <sup>10</sup>Department of Radiology, University Hospital Münster, Münster, Germany
- <sup>11</sup>Division of Pediatric Neurology, University Children's Hospital, Münster, Germany
- <sup>12</sup>Department of Pathology, CHU Sainte-Justine, Montreal, Canada
- <sup>13</sup>Division of Neuropathology, UCL Institute of Neurology, London, UK
- <sup>14</sup>Department of Clinical and Experimental Epilepsy, UCL Institute of Neurology, London, UK
- <sup>15</sup>Department of Pediatrics, The University of Melbourne, Melbourne, Australia
- <sup>16</sup>Bruce Lefroy Centre for Genetic Health Research, Murdoch Childrens Research Institute, Melbourne, Australia
- <sup>17</sup>Department of Neurology, The Royal Children's Hospital, Melbourne, Australia
- <sup>18</sup>Murdoch Childrens Research Institute, Melbourne, Australia
- <sup>19</sup>VUMC School of Medical Sciences, Amsterdam, The Netherlands
- <sup>20</sup>Department of Anatomical Pathology, Royal Children's Hospital, Melbourne, Australia; <sup>21</sup>German Cancer Consortium (DKTK), German Cancer Research Center (DKFZ), Heidelberg, Germany
- <sup>22</sup>Division of Pediatric Neurooncology (B062), German Cancer Research Center (DKFZ), Heidelberg, Germany
- <sup>23</sup>Department of Pathology, McGill University, Montreal Neurological Institute, Montreal, Quebec, Canada
- <sup>24</sup>Departments of Oncology and Epidemiology, Biostatistics & Occupational Health, McGill University, Montreal, Quebec, Canada
- <sup>25</sup>Institute of Human Genetics, Christian-Albrechts-University Kiel & University Hospital Schleswig-Holstein, Campus Kiel, Kiel, Germany
- <sup>26</sup>Department of Molecular Pathology and Neuropathology, Medical University of Lodz, Lodz, Poland
- <sup>27</sup>Department of Neurosurgery, Polish Mother's Memorial Hospital Research Institute, Lodz, Poland
- <sup>28</sup>Epilepsy Society, Bucks, UK
- <sup>29</sup>Institute of Neuropathology, University Hospital Münster, Münster, Germany
- <sup>30</sup>Department of Pathology, Montreal Children's Hospital, McGill University Health Centre, McGill University, Montreal, Quebec, Canada

<sup>31</sup>Department of Pediatrics, Montreal Children's Hospital, McGill University Health Centre, Montreal, Quebec, Canada

<sup>32</sup>Department of Medical Genetics and Cancer Research Program, Research Institute McGill University Health Centre, Montreal, Quebec, Canada

Correspondence to: Martin Hasselblatt, William D Foulkes or Jacek Majewski

[martin.hasselblatt@ukmuenster.de](mailto:martin.hasselblatt@ukmuenster.de), [william.foulkes@mcgill.ca](mailto:william.foulkes@mcgill.ca), [jacek.majewski@mcgill.ca](mailto:jacek.majewski@mcgill.ca)

**Suppl. Table 2a Significantly mutated genes in 40 sporadic DNET samples**

| Gene      | Rank | Fisher's p value | Q value     | Num case mutated | Num case | Num control mutated | Num control |
|-----------|------|------------------|-------------|------------------|----------|---------------------|-------------|
| FGFR1*    | 1    | 3.22E-10         | 5.02E-08    | 9                | 40       | 7                   | 1092        |
| GPR116    | 2    | 0.001218472      | 0.095040819 | 2                | 40       | 0                   | 1092        |
| MTPP      | 3    | 0.002965619      | 0.126957774 | 3                | 40       | 6                   | 1092        |
| CAMKV     | 4    | 0.005544323      | 0.126957774 | 3                | 40       | 8                   | 1092        |
| HAT1      | 5    | 0.006987059      | 0.126957774 | 2                | 40       | 2                   | 1092        |
| PSAPL1    | 6    | 0.006987059      | 0.126957774 | 2                | 40       | 2                   | 1092        |
| SYDE2     | 7    | 0.007212223      | 0.126957774 | 3                | 40       | 9                   | 1092        |
| COL8A1    | 8    | 0.007212223      | 0.126957774 | 3                | 40       | 9                   | 1092        |
| SLC14A1   | 9    | 0.011385188      | 0.126957774 | 2                | 40       | 3                   | 1092        |
| FAM216A   | 10   | 0.011385188      | 0.126957774 | 2                | 40       | 3                   | 1092        |
| TSEN2     | 11   | 0.011385188      | 0.126957774 | 2                | 40       | 3                   | 1092        |
| MS4A4A    | 12   | 0.011385188      | 0.126957774 | 2                | 40       | 3                   | 1092        |
| MIER3     | 13   | 0.011385188      | 0.126957774 | 2                | 40       | 3                   | 1092        |
| PLD4      | 14   | 0.011393646      | 0.126957774 | 4                | 40       | 22                  | 1092        |
| APCDD1    | 15   | 0.01669748       | 0.140875479 | 2                | 40       | 4                   | 1092        |
| ZNF514    | 16   | 0.01669748       | 0.140875479 | 2                | 40       | 4                   | 1092        |
| SPTBN1    | 17   | 0.019712761      | 0.140875479 | 3                | 40       | 14                  | 1092        |
| PRMT3     | 18   | 0.022857097      | 0.140875479 | 2                | 40       | 5                   | 1092        |
| USP2      | 19   | 0.022857097      | 0.140875479 | 2                | 40       | 5                   | 1092        |
| ZNF571    | 20   | 0.022857097      | 0.140875479 | 2                | 40       | 5                   | 1092        |
| ANO5      | 21   | 0.022857097      | 0.140875479 | 2                | 40       | 5                   | 1092        |
| KRTAP10-1 | 22   | 0.022857097      | 0.140875479 | 2                | 40       | 5                   | 1092        |
| PKLR      | 23   | 0.022857097      | 0.140875479 | 2                | 40       | 5                   | 1092        |
| FREM1     | 24   | 0.023082603      | 0.140875479 | 3                | 40       | 15                  | 1092        |
| CPEB2     | 25   | 0.026747759      | 0.140875479 | 3                | 40       | 16                  | 1092        |
| ZNF354A   | 26   | 0.029800582      | 0.140875479 | 2                | 40       | 6                   | 1092        |
| FAM173A   | 27   | 0.029800582      | 0.140875479 | 2                | 40       | 6                   | 1092        |
| MFN1      | 28   | 0.029800582      | 0.140875479 | 2                | 40       | 6                   | 1092        |
| LRP2BP    | 29   | 0.029800582      | 0.140875479 | 2                | 40       | 6                   | 1092        |
| RBM15B    | 30   | 0.029800582      | 0.140875479 | 2                | 40       | 6                   | 1092        |
| DENND3    | 31   | 0.029800582      | 0.140875479 | 2                | 40       | 6                   | 1092        |
| FOXJ3     | 32   | 0.029800582      | 0.140875479 | 2                | 40       | 6                   | 1092        |
| P2RX2     | 33   | 0.029800582      | 0.140875479 | 2                | 40       | 6                   | 1092        |
| DYNC2LI1  | 34   | 0.037467714      | 0.16238667  | 2                | 40       | 7                   | 1092        |
| SNX29     | 35   | 0.037467714      | 0.16238667  | 2                | 40       | 7                   | 1092        |
| REST      | 36   | 0.045801368      | 0.16238667  | 2                | 40       | 8                   | 1092        |
| TNIK      | 37   | 0.045801368      | 0.16238667  | 2                | 40       | 8                   | 1092        |
| CCNK      | 38   | 0.045801368      | 0.16238667  | 2                | 40       | 8                   | 1092        |
| SYTL1     | 39   | 0.045801368      | 0.16238667  | 2                | 40       | 8                   | 1092        |

| Gene     | Rank | Fisher's p value | Q value     | Num case mutated | Num case | Num control mutated | Num control |
|----------|------|------------------|-------------|------------------|----------|---------------------|-------------|
| OTUD7B   | 40   | 0.045801368      | 0.16238667  | 2                | 40       | 8                   | 1092        |
| PCDHGB6  | 41   | 0.045801368      | 0.16238667  | 2                | 40       | 8                   | 1092        |
| INPP5F   | 42   | 0.045801368      | 0.16238667  | 2                | 40       | 8                   | 1092        |
| ARHGAP29 | 43   | 0.045801368      | 0.16238667  | 2                | 40       | 8                   | 1092        |
| ASPH     | 44   | 0.045801368      | 0.16238667  | 2                | 40       | 8                   | 1092        |
| BCORL1^  | 83   | 0.154065807      | 0.340377946 | 2                | 40       | 17                  | 1092        |
| FAT1^    | 136  | 0.753908677      | 0.827992188 | 2                | 40       | 69                  | 1092        |
| NOTCH3^  | 143  | 0.664239474      | 0.751223214 | 2                | 40       | 58                  | 1092        |

Cancer panel genes are indicated as follows:

\*FoundationOne+Neuro-Oncology

^FoundationOne

**Table S2b Variants identified in cancer-related genes from Table S2a**

| Position           | Variation            | Ref | Alt | Cases affected | Case number | Gene       | Protein change | Polyphen 2 score | Mutation Taster Score |
|--------------------|----------------------|-----|-----|----------------|-------------|------------|----------------|------------------|-----------------------|
| chrX:12914748<br>1 | nonsynonymous<br>SNV | G   | A   | 1              | 15          | BCORL<br>1 | p.V245I        | 0.006            | 0                     |
| chrX:12914960<br>4 | frameshift deletion  | AT  | A   | 1              | 64          | BCORL<br>1 | p.S953fs       |                  |                       |
| chr4:18751804<br>7 | nonsynonymous<br>SNV | G   | C   | 1              | 47          | FAT1       | p.P4216<br>R   | 0.467            | 0.959                 |
| chr4:18762990<br>0 | nonsynonymous<br>SNV | T   | C   | 1              | 57          | FAT1       | p.K361R        | 0.003            | 0.954                 |
| chr19:1528496<br>4 | nonsynonymous<br>SNV | C   | A   | 1              | 41          | NOTCH<br>3 | p.G1551<br>C   | 1                | 1                     |
| chr19:1529809<br>8 | nonsynonymous<br>SNV | G   | C   | 1              | 52          | NOTCH<br>3 | p.P553R        | 1                | 1                     |
