# Supplementary material
Source: PubMed Central journal article supplement (PMC5039033)
Supplement: NIHMS813048-supplement-Supplementary_Data.pdf [file NIHMS813048-supplement-Supplementary_Data.pdf]

## **Acta Neuropathologica**

### **Germline and somatic FGFR1 abnormalities in dysembryoplastic neuroepithelial tumors**

Barbara Rivera<sup>1,2</sup> · Tenzin Gayden<sup>2</sup> · Jian Carrot-Zhang<sup>2,3</sup> · Javad Nadaf<sup>2,3</sup> · Talia Boshari<sup>4</sup> · Damien Faury<sup>2</sup> · Michele Zeinieh<sup>2</sup> · Romeo Blanc<sup>5</sup> · David L. Burk<sup>6</sup> · Somayyeh Fahiminiya<sup>2,3</sup> · Eric Bareke<sup>2,3</sup> · Ulrich Schüller<sup>7</sup> · Camelia M. Monoranu,<sup>8</sup> Ronald Sträter<sup>9</sup> · Kornelius Kerl<sup>9</sup> · Thomas Niederstadt<sup>10</sup> · Gerhard Kurlemann<sup>11</sup> · Benjamin Ellezam<sup>12</sup> · Zuzanna Michalak<sup>13,14</sup> · Maria Thom<sup>13,14</sup> · Paul J. Lockhart<sup>15,16</sup> · Richard J. Leventer<sup>15,17,18</sup> · Milou Ohm<sup>19</sup> · Duncan MacGregor<sup>20</sup> · David Jones<sup>21,22</sup> · Jason Karamchandani<sup>23</sup> · Celia MT Greenwood<sup>2,24</sup> · Albert M. Berghuis<sup>6</sup> · Susanne Bens<sup>25</sup> · Reiner Siebert<sup>25</sup> · Magdalena Zakrzewska<sup>26</sup> · Pawel P. Liberski<sup>26</sup> · Krzysztof Zakrzewski<sup>27</sup> · Sanjay M. Sisodiya<sup>14,28</sup> · Werner Paulus<sup>29</sup> · Steffen Albrecht<sup>30</sup> · Martin Hasselblatt<sup>29</sup> · Nada Jabado<sup>2,31</sup> · William D Foulkes<sup>1,2,4,32</sup> · Jacek Majewski<sup>2,3</sup>

<sup>1</sup>Program in Cancer Genetics, Department of Oncology and Human Genetics, McGill University, Montreal, Quebec, Canada

<sup>2</sup>Department of Human Genetics, McGill University, Montreal, Quebec, Canada

<sup>3</sup>McGill University and Génome Québec Innovation Centre, Montreal, Quebec, Canada; <sup>4</sup>Department of Medical Genetics, Lady Davis Institute and Segal Cancer Centre, Jewish General Hospital, McGill University, Montreal, Quebec, Canada.

<sup>5</sup>Bloomfield Center for Research on Aging, Lady Davis Institute for Medical Research, McGill University, Jewish General Hospital, Montréal, Quebec, Canada

<sup>6</sup>Department of Biochemistry and Groupe de Recherche Axé sur la Structure des Protéines, McGill University, Montreal, Quebec, Canada

<sup>7</sup>Center for Neuropathology, Ludwig-Maximilians-University, Munich, Germany

<sup>8</sup>Department of Neuropathology, Institute of Pathology, University of Würzburg, Comprehensive Cancer Center Mainfranken, Würzburg, Germany

<sup>9</sup>Pediatric Hematology and Oncology, University Children's Hospital Münster, Münster, Germany

- <sup>10</sup>Department of Radiology, University Hospital Münster, Münster, Germany
- <sup>11</sup>Division of Pediatric Neurology, University Children's Hospital, Münster, Germany
- <sup>12</sup>Department of Pathology, CHU Sainte-Justine, Montreal, Canada
- <sup>13</sup>Division of Neuropathology, UCL Institute of Neurology, London, UK
- <sup>14</sup>Department of Clinical and Experimental Epilepsy, UCL Institute of Neurology, London, UK
- <sup>15</sup>Department of Pediatrics, The University of Melbourne, Melbourne, Australia
- <sup>16</sup>Bruce Lefroy Centre for Genetic Health Research, Murdoch Childrens Research Institute, Melbourne, Australia
- <sup>17</sup>Department of Neurology, The Royal Children's Hospital, Melbourne, Australia
- <sup>18</sup>Murdoch Childrens Research Institute, Melbourne, Australia
- <sup>19</sup>VUMC School of Medical Sciences, Amsterdam, The Netherlands
- <sup>20</sup>Department of Anatomical Pathology, Royal Children's Hospital, Melbourne, Australia; <sup>21</sup>German Cancer Consortium (DKTK), German Cancer Research Center (DKFZ), Heidelberg, Germany
- <sup>22</sup>Division of Pediatric Neurooncology (B062), German Cancer Research Center (DKFZ), Heidelberg, Germany
- <sup>23</sup>Department of Pathology, McGill University, Montreal Neurological Institute, Montreal, Quebec, Canada
- <sup>24</sup>Departments of Oncology and Epidemiology, Biostatistics & Occupational Health, McGill University, Montreal, Quebec, Canada
- <sup>25</sup>Institute of Human Genetics, Christian-Albrechts-University Kiel & University Hospital Schleswig-Holstein, Campus Kiel, Kiel, Germany
- <sup>26</sup>Department of Molecular Pathology and Neuropathology, Medical University of Lodz, Lodz, Poland
- <sup>27</sup>Department of Neurosurgery, Polish Mother's Memorial Hospital Research Institute, Lodz, Poland
- <sup>28</sup>Epilepsy Society, Bucks, UK
- <sup>29</sup>Institute of Neuropathology, University Hospital Münster, Münster, Germany
- <sup>30</sup>Department of Pathology, Montreal Children's Hospital, McGill University Health Centre, McGill

University, Montreal, Quebec, Canada

<sup>31</sup>Department of Pediatrics, Montreal Children's Hospital, McGill University Health Centre, Montreal, Quebec, Canada

<sup>32</sup>Department of Medical Genetics and Cancer Research Program, Research Institute McGill University Health Centre, Montreal, Quebec, Canada

Correspondence to: Martin Hasselblatt, William D Foulkes or Jacek Majewski

[martin.hasselblatt@ukmuenster.de](mailto:martin.hasselblatt@ukmuenster.de), [william.foulkes@mcgill.ca](mailto:william.foulkes@mcgill.ca), [jacek.majewski@mcgill.ca](mailto:jacek.majewski@mcgill.ca)

## Supplementary Appendix

### Table of Contents

|                               |   |
|-------------------------------|---|
| Supplementary Methods .....   | 5 |
| Patients and samples .....    | 5 |
| The Index Family .....        | 6 |
| Suppl. Figure 1 .....         | 7 |
| Suppl. Figure 2 .....         | 7 |
| Suppl. Figure 3 .....         | 7 |
| Suppl. Figure 4 .....         | 7 |
| Suppl. Figure 5 .....         | 8 |
| Suppl. Figure 6 .....         | 8 |
| Suppl. Figure 7 .....         | 8 |
| Suppl. Table 1 .....          | 8 |
| Suppl. Table 2 .....          | 8 |
| Suppl. Table 3 .....          | 8 |
| Supplemental References ..... | 9 |

## Supplementary Methods

### Patients and samples

The study was approved by the Institutional Review Board (IRB) of the Faculty of Medicine of McGill University. Participants were recruited in compliance with the second edition of the Canadian Tri-Council Policy Statement of Ethical Conduct for Research Involving Humans and Eligible Persons or Designates and signed a consent form in accordance with the IRB approvals. Blood from 3 affected members from family 1 and 3 formalin fixed paraffin embedded (FFPE) blocks (2 primary tumors, one from each child plus a recurrence from the daughter) were collected. The sporadic series is composed by a total of 100 cases (29 fresh frozen tumor (FFT) samples and 71 FFPE samples). Samples from 96 persons were recruited under the diagnosis of DNET from the reference centers; age of diagnoses, sex of the patient and location of the tumor was collected with the samples. Formalin-fixed paraffin-embedded tumor samples from all patients were independently reviewed according to 2007 WHO criteria by three senior neuropathologists (S.A., M.H., W.P). In line with the WHO classification, only tumors containing the specific glioneuronal element were diagnosed as DNET. Because the concept of "non-specific" DNET (i.e. tumors showing clinical and imaging similarities with DNET but lacking the specific glioneuronal element) is controversial, also according to the current WHO classification, this diagnosis was not made. During the blinded pathology review cases were classified into three different groups: 1 - DNET cases meeting WHO criteria; 2 - Non-DNET cases for which a differential diagnosis was made, including ganglioglioma (n = 7), diffuse astrocytic tumor (n= 5), pilocytic astrocytoma (n = 3), oligodendroglial tumor (n = 2), cortical dysplasia (n = 2), low grade glioma (n = 2), meningo-angiomas (n = 1); 3 - Cases for which the diagnosis remained unclear because a) material was sparse, or some elements of DNET (such as nodular growth) were present but no glioneuronal element was encountered, or b) there was disagreement between the reference pathologists and a more definite diagnosis would require an extensive immunohistochemical /molecular work-up, for which no material was available. To be conservative for statistical purposes, these unclear cases were considered as non-DNETs, from here on in the text we will refer to them as that.

## **The Index Family**

In the index family, three cases of histopathologically- confirmed DNET occurred:

Case 1: In the 46- year old father, focal seizures with eye deviation to the right heralded the diagnosis of a tumor of the left occipital cortex at the age of six years. After tumor resection, the patient experienced no tumor recurrence and remained seizure-free. Except for right-sided hemianopsia, neurological examination was normal. Histopathologically, the tumor had been interpreted as oligodendroglioma initially (DNET was not recognized as an entity at that time), but reclassified as a DNET according to WHO criteria in 2004 [36].

Case 2: In the 17 year old daughter, focal seizures with eye deviation to the right occurred at the age of 6 years. On MRI, a non-contrast-enhancing mass in the left occipital cortex was detected, which was hypointense in the T1-weighted images. After tumor resection, the girl remained seizure-free for about three years. At the age of nine years, a local recurrence was completely resected. MRI scans during the neuro-oncological follow-up showed multiple non-contrast enhancing lesions supra- as well as infra-tentorially. At the age of 16 years the patient became symptomatic again (seizures with visual aura). The MRI scans revealed a progression of the lesion in the left occipital lobe. After repeat-surgery of the occipital lesions the patient is free of seizures with lamotrigine as a seizure prophylaxis. Except for right-sided hemianopsia, neurological development, as well as examination, is normal.

Case 3: In the 19 year old son, a DNET of the right temporal cortex was diagnosed when the patient was 9 year old after a history of focal seizures. Upon tumor resection, the patient remained seizure-free for seven years. Additionally, MRI scans during the neuro-oncological follow-up showed multiple non-contrast enhancing lesions located in the right posterior horn, the left frontal cortex and both thalami. At the age of 16 years, generalized seizures occurred. MRI scans showed a relapse with progression of the manifestation in the posterior horn of the right ventricle. After partial resection of the lesion in the right

posterior horn, the patient remains free of seizures with a prophylaxis of lamotrigene. Neurological development and examination is normal.

In all, in the index family, the father suffered from one single lesion whereas both children are suffering from multiple tumor lesions.

**Suppl. Figure 1** Germline expression of p.R661P in lymphocytes. Chromatograms of the mutant sequence c.1982G>C; p.R661P in individuals I.1, II.1 and II.2 in DNA and cDNA. Asterisks show the position of the mutation, dash line marked the exon-exon boundary

**Suppl. Figure 2** Validation of BRAF V600E by immunohistochemical staining. Case 70 BRAF V600E mutation validation by immunohistochemistry with anti-BRAF V600E specific antibody

**Suppl. Figure 3** Tyrosine Kinase Domain duplications schema. Samples with the FGFR1 tyrosine kinase domain (TKD) duplication and their breakpoints. The second TKD starts from the N-terminal of the TKD to the end of the domain. Dashed blue lines show inserted sequence as a linker between the duplicated domains. Breakpoints inside the intron between exon 9 and exon 10 probably result in skipping exon 18, and therefore directly join exon 17 and the second TKD

**Suppl. Figure 4** FISH results in 4 cases with either chromosomal breakpoints or gains of the *FGFR1* locus. FISH with *FGFR1* break apart probe (MetaSystems, Altussheim, Germany) for the cases 19, 40, 60 and 23. Each column represents one case. Yellow arrows point to co-localized signals, indicating intact *FGFR1* loci. Green and red arrows indicate split signals corresponding to a break in the *FGFR1* locus. Nuclei in the dotted boxes in the first and third row are magnified in the second and fourth row

**Suppl. Figure 5** Chromosomal Number Variants plot resulting from the WES analyses. Genome-wide recurrent plot of Allelic Imbalance (AI) generated by ExomaAI [58]. The Y axis indicates the frequency of chromosomal aberrations. The X axis shows genomic positions and colors represent chromosomes. The most frequent aberrations were on chromosome 7 and 22 (6 out of 46 samples)

**Suppl. Figure 6** Description of mutants in cis. A) Chromatogram resulting of the cloning of *FGFR1* exons 14 and 15 from the tumoral of DNA of individual II.1. Both germline and somatic mutations were confirming to be in cis. B) Table of clones showing double mutants in cis or wildtype sequences in 4 sporadic cases and individual II.1 C) Diagram of sequential mutational events in the individual II.1. D) Diagram both possibilities of sequential mutational events that will lead to a p.K656D mutant. F) Chromatograms and proposed sequential alterations that will result in the quadruple mutant p.K655V+p.K656E. Four nucleotide changes are required to produce this mutant. Due to the large number of possible combinations, only one is proposed. Occurrence of accompanying mutations in cis that increase the oncogenic properties of the first mutation has been described in *EGFR* and *NOTCH1* [33, 96]

**Suppl. Figure 7** Forward and side scatter plots of phospho-ERK measurement. a) Forward scatter plot. b) Side scatter plot. c) Histogram of phospho-ERK fluorescence intensity in the single cell populations

**Suppl. Table 1** Complete series of cases in the study and their diagnoses, age, sex, and location

**Suppl. Table 2** a) Significantly mutated genes in 40 sporadic DNET samples b) Variants identified in cancer-related genes from Table S4a.

**Suppl. Table 3** Figure 5- associated table. Description of phenotypes



## Supplemental References

1. Ahn SM, Jang SJ, Shim JH, Kim D, Hong SM, Sung CO, Baek D, Haq F, Ansari AA, Lee SY, Chun SM, Choi S, Choi HJ, Kim J, Kim S, Hwang S, Lee YJ, Lee JE, Jung WR, Jang HY, Yang E, Sung WK, Lee NP, Mao M, Lee C, Zucman-Rossi J, Yu E, Lee HC, Kong G (2014) Genomic portrait of resectable hepatocellular carcinomas: implications of RB1 and FGF19 aberrations for patient stratification. *Hepatology* 60:1972-1982. doi:10.1002/hep.27198
2. Aihara K, Mukasa A, Gotoh K, Saito K, Nagae G, Tsuji S, Tatsuno K, Yamamoto S, Takayanagi S, Narita Y, Shibui S, Aburatani H, Saito N (2014) H3F3A K27M mutations in thalamic gliomas from young adult patients. *Neuro Oncol* 16:140-146. doi:10.1093/neuonc/not144
3. Albuissou J, Pecheux C, Carel JC, Lacombe D, Leheup B, Lapuzina P, Bouchard P, Legius E, Matthijs G, Wasniewska M, Delpech M, Young J, Hardelin JP, Dode C (2005) Kallmann syndrome: 14 novel mutations in KAL1 and FGFR1 (KAL2). *Hum Mutat* 25:98-99. doi:10.1002/humu.9298
4. Bailleul-Forestier I, Gros C, Zenaty D, Bennaceur S, Leger J, de Roux N (2010) Dental agenesis in Kallmann syndrome individuals with FGFR1 mutations. *Int J Paediatr Dent* 20:305-312. doi:10.1111/j.1365-263X.2010.01056.x
5. Barbieri CE, Baca SC, Lawrence MS, Demichelis F, Blattner M, Theurillat JP, White TA, Stojanov P, Van Allen E, Stransky N, Nickerson E, Chae SS, Boysen G, Auclair D, Onofrio RC, Park K, Kitabayashi N, MacDonald TY, Sheikh K, Vuong T, Guiducci C, Cibulskis K, Sivachenko A, Carter SL, Saksena G, Voet D, Hussain WM, Ramos AH, Winckler W, Redman MC, Ardlie K, Tewari AK, Mosquera JM, Rupp N, Wild PJ, Moch H, Morrissey C, Nelson PS, Kantoff PW, Gabriel SB, Golub TR, Meyerson M, Lander ES, Getz G, Rubin MA, Garraway LA (2012) Exome sequencing identifies recurrent SPOP, FOXA1 and MED12 mutations in prostate cancer. *Nature genetics* 44:685-689. doi:10.1038/ng.2279
6. Beighton P, Cremin BJ, Kozlowski K (1980) Osteoglophonic dwarfism. *Pediatr Radiol* 10:46-50

7. Brokinkel B, Peetz-Dienhart S, Ligges S, Brentrup A, Stummer W, Paulus W, Hasselblatt M (2015) A comparative analysis of MAPK pathway hallmark alterations in pilocytic astrocytomas: age-related and mutually exclusive. [corrected]. *Neuropathol Appl Neurobiol* 41:258-261. doi:10.1111/nan.12145
8. Cadman SM, Kim SH, Hu Y, Gonzalez-Martinez D, Bouloux PM (2007) Molecular pathogenesis of Kallmann's syndrome. *Horm Res* 67:231-242. doi:10.1159/000098156
9. Cancer Genome Atlas N (2012) Comprehensive molecular characterization of human colon and rectal cancer. *Nature* 487:330-337. doi:10.1038/nature11252
10. Cancer Genome Atlas Research N (2011) Integrated genomic analyses of ovarian carcinoma. *Nature* 474:609-615. doi:10.1038/nature10166
11. Cancer Genome Atlas Research N (2012) Comprehensive genomic characterization of squamous cell lung cancers. *Nature* 489:519-525. doi:10.1038/nature11404
12. Cancer Genome Atlas Research N (2014) Comprehensive molecular characterization of urothelial bladder carcinoma. *Nature* 507:315-322. doi:10.1038/nature12965
13. Caronia LM, Martin C, Welt CK, Sykiotis GP, Quinton R, Thambundit A, Avbelj M, Dhruvakumar S, Plummer L, Hughes VA, Seminara SB, Boepple PA, Sidis Y, Crowley WF, Jr., Martin KA, Hall JE, Pitteloud N (2011) A genetic basis for functional hypothalamic amenorrhea. *The New England journal of medicine* 364:215-225. doi:10.1056/NEJMoa0911064
14. Cerami E, Gao J, Dogrusoz U, Gross BE, Sumer SO, Aksoy BA, Jacobsen A, Byrne CJ, Heuer ML, Larsson E, Antipin Y, Reva B, Goldberg AP, Sander C, Schultz N (2012) The cBio cancer genomics portal: an open platform for exploring multidimensional cancer genomics data. *Cancer discovery* 2:401-404. doi:10.1158/2159-8290.CD-12-0095
15. Chong IY, Cunningham D, Barber LJ, Campbell J, Chen L, Kozarewa I, Fenwick K, Assiotis I, Guettler S, Garcia-Murillas I, Awan S, Lambros M, Starling N, Wotherspoon A, Stamp G, Gonzalez-de-Castro D, Benson M, Chau I, Hulkki S, Nohadani M, Eltahir Z, Lemnrau A, Orr N,

- Rao S, Lord CJ, Ashworth A (2013) The genomic landscape of oesophagogastric junctional adenocarcinoma. *The Journal of pathology* 231:301-310
16. Correa FA, Trarbach EB, Tusset C, Latronico AC, Montenegro LR, Carvalho LR, Franca MM, Otto AP, Costalonga EF, Brito VN, Abreu AP, Nishi MY, Jorge AA, Arnhold IJ, Sidis Y, Pitteloud N, Mendonca BB (2015) FGFR1 and PROKR2 rare variants found in patients with combined pituitary hormone deficiencies. *Endocr Connect* 4:100-107. doi:10.1530/EC-15-0015
  17. Crompton BD, Stewart C, Taylor-Weiner A, Alexe G, Kurek KC, Calicchio ML, Kiezun A, Carter SL, Shukla SA, Mehta SS, Thorner AR, de Torres C, Lavarino C, Sunol M, McKenna A, Sivachenko A, Cibulskis K, Lawrence MS, Stojanov P, Rosenberg M, Ambrogio L, Auclair D, Seepo S, Blumenstiel B, DeFelice M, Imaz-Rosshandler I, Schwarz-Cruz YCA, Rivera MN, Rodriguez-Galindo C, Fleming MD, Golub TR, Getz G, Mora J, Stegmaier K (2014) The genomic landscape of pediatric Ewing sarcoma. *Cancer discovery* 4:1326-1341. doi:10.1158/2159-8290.CD-13-1037
  18. Dahl C, Christensen C, Jonsson G, Lorentzen A, Skjodt ML, Borg A, Pawelec G, Guldborg P (2013) Mutual exclusivity analysis of genetic and epigenetic drivers in melanoma identifies a link between p14 ARF and RARbeta signaling. *Mol Cancer Res* 11:1166-1178. doi:10.1158/1541-7786.MCR-13-0006
  19. Davies H, Hunter C, Smith R, Stephens P, Greenman C, Bignell G, Teague J, Butler A, Edkins S, Stevens C, Parker A, O'Meara S, Avis T, Barthorpe S, Brackenbury L, Buck G, Clements J, Cole J, Dicks E, Edwards K, Forbes S, Gorton M, Gray K, Halliday K, Harrison R, Hills K, Hinton J, Jones D, Kosmidou V, Laman R, Lugg R, Menzies A, Perry J, Petty R, Raine K, Shepherd R, Small A, Solomon H, Stephens Y, Tofts C, Varian J, Webb A, West S, Widaa S, Yates A, Brasseur F, Cooper CS, Flanagan AM, Green A, Knowles M, Leung SY, Looijenga LH, Malkowicz B, Pierotti MA, Teh BT, Yuen ST, Lakhani SR, Easton DF, Weber BL, Goldstraw P, Nicholson AG, Wooster R, Stratton MR, Futreal PA (2005) Somatic mutations of the protein kinase gene family in human lung cancer. *Cancer Res* 65:7591-7595. doi:10.1158/0008-5472.CAN-05-1855

20. De Keersmaecker K, Atak ZK, Li N, Vicente C, Patchett S, Girardi T, Gianfelici V, Geerdens E, Clappier E, Porcu M, Lahortiga I, Luca R, Yan J, Hulselmans G, Vranckx H, Vandepoel R, Sweron B, Jacobs K, Mentens N, Wlodarska I, Cauwelier B, Cloos J, Soulier J, Uyttebroeck A, Bagni C, Hassan BA, Vandenberghe P, Johnson AW, Aerts S, Cools J (2013) Exome sequencing identifies mutation in CNOT3 and ribosomal genes RPL5 and RPL10 in T-cell acute lymphoblastic leukemia. *Nature genetics* 45:186-190. doi:10.1038/ng.2508
21. Dode C, Fouveaut C, Mortier G, Janssens S, Bertherat J, Mahoudeau J, Kottler ML, Chabrolle C, Gancel A, Francois I, Devriendt K, Wolczynski S, Pugeat M, Pineiro-Garcia A, Murat A, Bouchard P, Young J, Delpech M, Hardelin JP (2007) Novel FGFR1 sequence variants in Kallmann syndrome, and genetic evidence that the FGFR1c isoform is required in olfactory bulb and palate morphogenesis. *Hum Mutat* 28:97-98. doi:10.1002/humu.9470
22. Dode C, Levilliers J, Dupont JM, De Paepe A, Le Du N, Soussi-Yanicostas N, Coimbra RS, Delmaghani S, Compain-Nouaille S, Baverel F, Pecheux C, Le Tessier D, Cruaud C, Delpech M, Speleman F, Vermeulen S, Amalfitano A, Bachelot Y, Bouchard P, Cabrol S, Carel JC, Delemarre-van de Waal H, Goulet-Salmon B, Kottler ML, Richard O, Sanchez-Franco F, Saura R, Young J, Petit C, Hardelin JP (2003) Loss-of-function mutations in FGFR1 cause autosomal dominant Kallmann syndrome. *Nature genetics* 33:463-465. doi:10.1038/ng1122
23. Drilon A, Wang L, Arcila ME, Balasubramanian S, Greenbowe JR, Ross JS, Stephens P, Lipson D, Miller VA, Kris MG, Ladanyi M, Rizvi NA (2015) Broad, Hybrid Capture-Based Next-Generation Sequencing Identifies Actionable Genomic Alterations in Lung Adenocarcinomas Otherwise Negative for Such Alterations by Other Genomic Testing Approaches. *Clinical cancer research: an official journal of the American Association for Cancer Research* 21:3631-3639. doi:10.1158/1078-0432.CCR-14-2683
24. Dulak AM, Stojanov P, Peng S, Lawrence MS, Fox C, Stewart C, Bandla S, Imamura Y, Schumacher SE, Shefler E, McKenna A, Carter SL, Cibulskis K, Sivachenko A, Saksena G, Voet D, Ramos AH, Auclair D, Thompson K, Sougnez C, Onofrio RC, Guiducci C, Beroukhir R, Zhou

- Z, Lin L, Lin J, Reddy R, Chang A, Landrenau R, Pennathur A, Ogino S, Luketich JD, Golub TR, Gabriel SB, Lander ES, Beer DG, Godfrey TE, Getz G, Bass AJ (2013) Exome and whole-genome sequencing of esophageal adenocarcinoma identifies recurrent driver events and mutational complexity. *Nature genetics* 45:478-486. doi:10.1038/ng.2591
25. Falardeau J, Chung WC, Beenken A, Raivio T, Plummer L, Sidis Y, Jacobson-Dickman EE, Eliseenkova AV, Ma J, Dwyer A, Quinton R, Na S, Hall JE, Huot C, Alois N, Pearce SH, Cole LW, Hughes V, Mohammadi M, Tsai P, Pitteloud N (2008) Decreased FGF8 signaling causes deficiency of gonadotropin-releasing hormone in humans and mice. *J Clin Invest* 118:2822-2831. doi:10.1172/JCI34538
26. Farrow EG, Davis SI, Mooney SD, Beighton P, Mascarenhas L, Gutierrez YR, Pitukcheewanont P, White KE (2006) Extended mutational analyses of FGFR1 in osteoglophonic dysplasia. *Am J Med Genet A* 140:537-539. doi:10.1002/ajmg.a.31106
27. Fortin JP, Hansen KD (2015) Reconstructing A/B compartments as revealed by Hi-C using long-range correlations in epigenetic data. *Genome biology* 16:180. doi:10.1186/s13059-015-0741-y
28. Frattini V, Trifonov V, Chan JM, Castano A, Lia M, Abate F, Keir ST, Ji AX, Zoppoli P, Niola F, Danussi C, Dolgalev I, Porrati P, Pellegatta S, Heguy A, Gupta G, Pisapia DJ, Canoll P, Bruce JN, McLendon RE, Yan H, Aldape K, Finocchiaro G, Mikkelsen T, Prive GG, Bigner DD, Lasorella A, Rabadan R, Iavarone A (2013) The integrated landscape of driver genomic alterations in glioblastoma. *Nature genetics* 45:1141-1149. doi:10.1038/ng.2734
29. Gao J, Aksoy BA, Dogrusoz U, Dresdner G, Gross B, Sumer SO, Sun Y, Jacobsen A, Sinha R, Larsson E, Cerami E, Sander C, Schultz N (2013) Integrative analysis of complex cancer genomics and clinical profiles using the cBioPortal. *Science signaling* 6:p11. doi:10.1126/scisignal.2004088
30. Gessi M, Abdel Moneim Y, Hammes J, Waha A, Pietsch T (2014) FGFR1 N546K mutation in a case of papillary glioneuronal tumor (PGNT). *Acta Neuropathol* 127:935-936. doi:10.1007/s00401-014-1283-1

31. Gessi M, Moneim YA, Hammes J, Goschzik T, Scholz M, Denkhaus D, Waha A, Pietsch T (2014) FGFR1 mutations in Rosette-forming glioneuronal tumors of the fourth ventricle. *J Neuropathol Exp Neurol* 73:580-584. doi:10.1097/NEN.0000000000000080
32. Giannakis M, Hodis E, Jasmine Mu X, Yamauchi M, Rosenbluh J, Cibulskis K, Saksena G, Lawrence MS, Qian ZR, Nishihara R, Van Allen EM, Hahn WC, Gabriel SB, Lander ES, Getz G, Ogino S, Fuchs CS, Garraway LA (2014) RNF43 is frequently mutated in colorectal and endometrial cancers. *Nature genetics* 46:1264-1266. doi:10.1038/ng.3127
33. Godin-Heymann N, Bryant I, Rivera MN, Ulkus L, Bell DW, Riese DJ, 2nd, Settleman J, Haber DA (2007) Oncogenic activity of epidermal growth factor receptor kinase mutant alleles is enhanced by the T790M drug resistance mutation. *Cancer research* 67:7319-7326. doi:10.1158/0008-5472.CAN-06-4625
34. Guo G, Sun X, Chen C, Wu S, Huang P, Li Z, Dean M, Huang Y, Jia W, Zhou Q, Tang A, Yang Z, Li X, Song P, Zhao X, Ye R, Zhang S, Lin Z, Qi M, Wan S, Xie L, Fan F, Nickerson ML, Zou X, Hu X, Xing L, Lv Z, Mei H, Gao S, Liang C, Gao Z, Lu J, Yu Y, Liu C, Li L, Fang X, Jiang Z, Yang J, Li C, Zhao X, Chen J, Zhang F, Lai Y, Lin Z, Zhou F, Chen H, Chan HC, Tsang S, Theodorescu D, Li Y, Zhang X, Wang J, Yang H, Gui Y, Wang J, Cai Z (2013) Whole-genome and whole-exome sequencing of bladder cancer identifies frequent alterations in genes involved in sister chromatid cohesion and segregation. *Nature genetics* 45:1459-1463. doi:10.1038/ng.2798
35. Han SW, Kim HP, Shin JY, Jeong EG, Lee WC, Lee KH, Won JK, Kim TY, Oh DY, Im SA, Bang YJ, Jeong SY, Park KJ, Park JG, Kang GH, Seo JS, Kim JI, Kim TY (2013) Targeted sequencing of cancer-related genes in colorectal cancer using next-generation sequencing. *PloS one* 8:e64271. doi:10.1371/journal.pone.0064271
36. Hasselblatt M, Kurlemann G, Rickert CH, Debus OM, Brentrup A, Schachenmayr W, Paulus W (2004) Familial occurrence of dysembryoplastic neuroepithelial tumor. *Neurology* 62:1020-1021
37. Hodis E, Watson IR, Kryukov GV, Arold ST, Imielinski M, Theurillat JP, Nickerson E, Auclair D, Li L, Place C, Dicara D, Ramos AH, Lawrence MS, Cibulskis K, Sivachenko A, Voet D, Saksena

- G, Stransky N, Onofrio RC, Winckler W, Ardlie K, Wagle N, Wargo J, Chong K, Morton DL, Stemke-Hale K, Chen G, Noble M, Meyerson M, Ladbury JE, Davies MA, Gershenwald JE, Wagner SN, Hoon DS, Schadendorf D, Lander ES, Gabriel SB, Getz G, Garraway LA, Chin L (2012) A landscape of driver mutations in melanoma. *Cell* 150:251-263.  
doi:10.1016/j.cell.2012.06.024
38. Imielinski M, Berger AH, Hammerman PS, Hernandez B, Pugh TJ, Hodis E, Cho J, Suh J, Capelletti M, Sivachenko A, Sougnez C, Auclair D, Lawrence MS, Stojanov P, Cibulskis K, Choi K, de Waal L, Sharifnia T, Brooks A, Greulich H, Banerji S, Zander T, Seidel D, Leenders F, Ansen S, Ludwig C, Engel-Riedel W, Stoelben E, Wolf J, Goparju C, Thompson K, Winckler W, Kwiatkowski D, Johnson BE, Janne PA, Miller VA, Pao W, Travis WD, Pass HI, Gabriel SB, Lander ES, Thomas RK, Garraway LA, Getz G, Meyerson M (2012) Mapping the hallmarks of lung adenocarcinoma with massively parallel sequencing. *Cell* 150:1107-1120.  
doi:10.1016/j.cell.2012.08.029
39. Jiao Y, Pawlik TM, Anders RA, Selaru FM, Streppel MM, Lucas DJ, Niknafs N, Guthrie VB, Maitra A, Argani P, Offerhaus GJ, Roa JC, Roberts LR, Gores GJ, Popescu I, Alexandrescu ST, Dima S, Fassan M, Simbolo M, Mafficini A, Capelli P, Lawlor RT, Ruzzenente A, Guglielmi A, Tortora G, de Braud F, Scarpa A, Jarnagin W, Klimstra D, Karchin R, Velculescu VE, Hruban RH, Vogelstein B, Kinzler KW, Papadopoulos N, Wood LD (2013) Exome sequencing identifies frequent inactivating mutations in BAP1, ARID1A and PBRM1 in intrahepatic cholangiocarcinomas. *Nature genetics* 45:1470-1473. doi:10.1038/ng.2813
40. Jones DT, Hutter B, Jager N, Korshunov A, Kool M, Warnatz HJ, Zichner T, Lambert SR, Ryzhova M, Quang DA, Fontebasso AM, Stutz AM, Hutter S, Zuckermann M, Sturm D, Gronych J, Lasitschka B, Schmidt S, Seker-Cin H, Witt H, Sultan M, Ralser M, Northcott PA, Hovestadt V, Bender S, Pfaff E, Stark S, Faury D, Schwartzentruber J, Majewski J, Weber UD, Zapatka M, Raeder B, Schlesner M, Worth CL, Bartholomae CC, von Kalle C, Imbusch CD, Radomski S, Lawerenz C, van Sluis P, Koster J, Volckmann R, Versteeg R, Lehrach H, Monoranu C, Winkler B,

- Unterberg A, Herold-Mende C, Milde T, Kulozik AE, Ebinger M, Schuhmann MU, Cho YJ, Pomeroy SL, von Deimling A, Witt O, Taylor MD, Wolf S, Karajannis MA, Eberhart CG, Scheurlen W, Hasselblatt M, Ligon KL, Kieran MW, Korbel JO, Yaspo ML, Brors B, Felsberg J, Reifenberger G, Collins VP, Jabado N, Eils R, Lichter P, Pfister SM, International Cancer Genome Consortium PedBrain Tumor P (2013) Recurrent somatic alterations of FGFR1 and NTRK2 in pilocytic astrocytoma. *Nature genetics* 45:927-932. doi:10.1038/ng.2682
41. Kakiuchi M, Nishizawa T, Ueda H, Gotoh K, Tanaka A, Hayashi A, Yamamoto S, Tatsuno K, Katoh H, Watanabe Y, Ichimura T, Ushiku T, Funahashi S, Tateishi K, Wada I, Shimizu N, Nomura S, Koike K, Seto Y, Fukayama M, Aburatani H, Ishikawa S (2014) Recurrent gain-of-function mutations of RHOA in diffuse-type gastric carcinoma. *Nature genetics* 46:583-587. doi:10.1038/ng.2984
42. Kalender Atak Z, De Keersmaecker K, Gianfelici V, Geerdens E, Vandepoel R, Pauwels D, Porcu M, Lahortiga I, Brys V, Dirks WG, Quentmeier H, Cloos J, Cuppens H, Uyttebroeck A, Vandenberghe P, Cools J, Aerts S (2012) High accuracy mutation detection in leukemia on a selected panel of cancer genes. *PloS one* 7:e38463. doi:10.1371/journal.pone.0038463
43. Kan Z, Jaiswal BS, Stinson J, Janakiraman V, Bhatt D, Stern HM, Yue P, Haverty PM, Bourgon R, Zheng J, Moorhead M, Chaudhuri S, Tomsho LP, Peters BA, Pujara K, Cordes S, Davis DP, Carlton VE, Yuan W, Li L, Wang W, Eigenbrot C, Kaminker JS, Eberhard DA, Waring P, Schuster SC, Modrusan Z, Zhang Z, Stokoe D, de Sauvage FJ, Faham M, Seshagiri S (2010) Diverse somatic mutation patterns and pathway alterations in human cancers. *Nature* 466:869-873. doi:10.1038/nature09208
44. Killela PJ, Pirozzi CJ, Reitman ZJ, Jones S, Rasheed BA, Lipp E, Friedman H, Friedman AH, He Y, McLendon RE, Bigner DD, Yan H (2014) The genetic landscape of anaplastic astrocytoma. *Oncotarget* 5:1452-1457
45. Kim PH, Cha EK, Sfakianos JP, Iyer G, Zabor EC, Scott SN, Ostrovnaya I, Ramirez R, Sun A, Shah R, Yee AM, Reuter VE, Bajorin DF, Rosenberg JE, Schultz N, Berger MF, Al-Ahmadie HA,



- Solit DB, Bochner BH (2015) Genomic predictors of survival in patients with high-grade urothelial carcinoma of the bladder. *European urology* 67:198-201. doi:10.1016/j.eururo.2014.06.050
46. Kim TM, Jung SH, Baek IP, Lee SH, Choi YJ, Lee JY, Chung YJ, Lee SH (2014) Regional biases in mutation screening due to intratumoural heterogeneity of prostate cancer. *The Journal of pathology* 233:425-435. doi:10.1002/path.4380
47. Kress W, Petersen B, Collmann H, Grimm T (2000) An unusual FGFR1 mutation (fibroblast growth factor receptor 1 mutation) in a girl with non-syndromic trigonocephaly. *Cytogenet Cell Genet* 91:138-140. doi:56834
48. Kunze K, Spieker T, Gamerding U, Nau K, Berger J, Dreyer T, Sindermann JR, Hoffmeier A, Gattenlohner S, Brauning A (2014) A recurrent activating PLCG1 mutation in cardiac angiosarcomas increases apoptosis resistance and invasiveness of endothelial cells. *Cancer Res* 74:6173-6183. doi:10.1158/0008-5472.CAN-14-1162
49. Laitinen EM, Tommiska J, Dunkel L, Sankilampi U, Vaaralahti K, Raivio T (2010) Idiopathic hypogonadotropic hypogonadism in a mother and her monozygotic twins born after a single embryo transfer. *Fertil Steril* 93:2074 e2013-2076. doi:10.1016/j.fertnstert.2009.11.013
50. Laitinen EM, Vaaralahti K, Tommiska J, Eklund E, Tervaniemi M, Valanne L, Raivio T (2011) Incidence, phenotypic features and molecular genetics of Kallmann syndrome in Finland. *Orphanet J Rare Dis* 6:41. doi:10.1186/1750-1172-6-41
51. Landau DA, Carter SL, Stojanov P, McKenna A, Stevenson K, Lawrence MS, Sougnez C, Stewart C, Sivachenko A, Wang L, Wan Y, Zhang W, Shukla SA, Vartanov A, Fernandes SM, Saksena G, Cibulskis K, Tesar B, Gabriel S, Hacohen N, Meyerson M, Lander ES, Neuberger D, Brown JR, Getz G, Wu CJ (2013) Evolution and impact of subclonal mutations in chronic lymphocytic leukemia. *Cell* 152:714-726. doi:10.1016/j.cell.2013.01.019
52. Li H (2011) A statistical framework for SNP calling, mutation discovery, association mapping and population genetical parameter estimation from sequencing data. *Bioinformatics* 27:2987-2993. doi:10.1093/bioinformatics/btr509

53. Li M, Zhang Z, Li X, Ye J, Wu X, Tan Z, Liu C, Shen B, Wang XA, Wu W, Zhou D, Zhang D, Wang T, Liu B, Qu K, Ding Q, Weng H, Ding Q, Mu J, Shu Y, Bao R, Cao Y, Chen P, Liu T, Jiang L, Hu Y, Dong P, Gu J, Lu W, Shi W, Lu J, Gong W, Tang Z, Zhang Y, Wang X, Chin YE, Weng X, Zhang H, Tang W, Zheng Y, He L, Wang H, Liu Y, Liu Y (2014) Whole-exome and targeted gene sequencing of gallbladder carcinoma identifies recurrent mutations in the ErbB pathway. *Nature genetics* 46:872-876. doi:10.1038/ng.3030
54. Martin M, Masshofer L, Temming P, Rahmann S, Metz C, Bornfeld N, van de Nes J, Klein-Hitpass L, Hinnebusch AG, Horsthemke B, Lohmann DR, Zeschnigk M (2013) Exome sequencing identifies recurrent somatic mutations in EIF1AX and SF3B1 in uveal melanoma with disomy 3. *Nature genetics* 45:933-936. doi:10.1038/ng.2674
55. Miraoui H, Dwyer AA, Sykiotis GP, Plummer L, Chung W, Feng B, Beenken A, Clarke J, Pers TH, Dworzynski P, Keefe K, Niedziela M, Raivio T, Crowley WF, Jr., Seminara SB, Quinton R, Hughes VA, Kumanov P, Young J, Yialamas MA, Hall JE, Van Vliet G, Chanoine JP, Rubenstein J, Mohammadi M, Tsai PS, Sidis Y, Lage K, Pitteloud N (2013) Mutations in FGF17, IL17RD, DUSP6, SPRY4, and FLRT3 are identified in individuals with congenital hypogonadotropic hypogonadism. *American journal of human genetics* 92:725-743. doi:10.1016/j.ajhg.2013.04.008
56. Mouradov D, Sloggett C, Jorissen RN, Love CG, Li S, Burgess AW, Arango D, Strausberg RL, Buchanan D, Wormald S, O'Connor L, Wilding JL, Bicknell D, Tomlinson IP, Bodmer WF, Mariadason JM, Sieber OM (2014) Colorectal cancer cell lines are representative models of the main molecular subtypes of primary cancer. *Cancer Res* 74:3238-3247. doi:10.1158/0008-5472.CAN-14-0013
57. Muenke M, Schell U, Hehr A, Robin NH, Losken HW, Schinzel A, Pulleyn LJ, Rutland P, Reardon W, Malcolm S, et al. (1994) A common mutation in the fibroblast growth factor receptor 1 gene in Pfeiffer syndrome. *Nature genetics* 8:269-274. doi:10.1038/ng1194-269

58. Nadaf J, Majewski J, Fahiminiya S (2015) ExomeAI: detection of recurrent allelic imbalance in tumors using whole-exome sequencing data. *Bioinformatics* 31:429-431.  
doi:10.1093/bioinformatics/btu665
59. Peifer M, Fernandez-Cuesta L, Sos ML, George J, Seidel D, Kasper LH, Plenker D, Leenders F, Sun R, Zander T, Menon R, Koker M, Dahmen I, Muller C, Di Cerbo V, Schildhaus HU, Altmuller J, Baessmann I, Becker C, de Wilde B, Vandesompele J, Bohm D, Ansen S, Gabler F, Wilkening I, Heynck S, Heuckmann JM, Lu X, Carter SL, Cibulskis K, Banerji S, Getz G, Park KS, Rauh D, Grutter C, Fischer M, Pasqualucci L, Wright G, Wainer Z, Russell P, Petersen I, Chen Y, Stoelben E, Ludwig C, Schnabel P, Hoffmann H, Muley T, Brockmann M, Engel-Riedel W, Muscarella LA, Fazio VM, Groen H, Timens W, Sietsma H, Thunnissen E, Smit E, Heideman DA, Snijders PJ, Cappuzzo F, Ligorio C, Damiani S, Field J, Solberg S, Brustugun OT, Lund-Iversen M, Sanger J, Clement JH, Soltermann A, Moch H, Weder W, Solomon B, Soria JC, Validire P, Besse B, Brambilla E, Brambilla C, Lantuejoul S, Lorimier P, Schneider PM, Hallek M, Pao W, Meyerson M, Sage J, Shendure J, Schneider R, Buttner R, Wolf J, Nurnberg P, Perner S, Heukamp LC, Brindle PK, Haas S, Thomas RK (2012) Integrative genome analyses identify key somatic driver mutations of small-cell lung cancer. *Nature genetics* 44:1104-1110. doi:10.1038/ng.2396
60. Pickering CR, Zhou JH, Lee JJ, Drummond JA, Peng SA, Saade RE, Tsai KY, Curry JL, Tetzlaff MT, Lai SY, Yu J, Muzny DM, Doddapaneni H, Shinbrot E, Covington KR, Zhang J, Seth S, Caulin C, Clayman GL, El-Naggar AK, Gibbs RA, Weber RS, Myers JN, Wheeler DA, Frederick MJ (2014) Mutational landscape of aggressive cutaneous squamous cell carcinoma. *Clinical cancer research : an official journal of the American Association for Cancer Research* 20:6582-6592.  
doi:10.1158/1078-0432.CCR-14-1768
61. Pitteloud N, Acierno JS, Jr., Meysing A, Eliseenkova AV, Ma J, Ibrahimi OA, Metzger DL, Hayes FJ, Dwyer AA, Hughes VA, Yialamas M, Hall JE, Grant E, Mohammadi M, Crowley WF, Jr. (2006) Mutations in fibroblast growth factor receptor 1 cause both Kallmann syndrome and

- normosmic idiopathic hypogonadotropic hypogonadism. *Proceedings of the National Academy of Sciences of the United States of America* 103:6281-6286. doi:10.1073/pnas.0600962103
62. Pitteloud N, Meysing A, Quinton R, Acierno JS, Jr., Dwyer AA, Plummer L, Fliers E, Boepple P, Hayes F, Seminara S, Hughes VA, Ma J, Bouloux P, Mohammadi M, Crowley WF, Jr. (2006) Mutations in fibroblast growth factor receptor 1 cause Kallmann syndrome with a wide spectrum of reproductive phenotypes. *Mol Cell Endocrinol* 254-255:60-69. doi:10.1016/j.mce.2006.04.021
63. Pitteloud N, Quinton R, Pearce S, Raivio T, Acierno J, Dwyer A, Plummer L, Hughes V, Seminara S, Cheng YZ, Li WP, Maccoll G, Eliseenkova AV, Olsen SK, Ibrahimi OA, Hayes FJ, Boepple P, Hall JE, Bouloux P, Mohammadi M, Crowley W (2007) Digenic mutations account for variable phenotypes in idiopathic hypogonadotropic hypogonadism. *J Clin Invest* 117:457-463. doi:10.1172/JCI29884
64. Pugh TJ, Morozova O, Attiyeh EF, Asgharzadeh S, Wei JS, Auclair D, Carter SL, Cibulskis K, Hanna M, Kiezun A, Kim J, Lawrence MS, Lichtenstein L, McKenna A, Peadarallu CS, Ramos AH, Shefler E, Sivachenko A, Sougnez C, Stewart C, Ally A, Birol I, Chiu R, Corbett RD, Hirst M, Jackman SD, Kamoh B, Khodabakshi AH, Krzywinski M, Lo A, Moore RA, Mungall KL, Qian J, Tam A, Thiessen N, Zhao Y, Cole KA, Diamond M, Diskin SJ, Mosse YP, Wood AC, Ji L, Sposto R, Badgett T, London WB, Moyer Y, Gastier-Foster JM, Smith MA, Guidry Auvil JM, Gerhard DS, Hogarty MD, Jones SJ, Lander ES, Gabriel SB, Getz G, Seeger RC, Khan J, Marra MA, Meyerson M, Maris JM (2013) The genetic landscape of high-risk neuroblastoma. *Nature genetics* 45:279-284. doi:10.1038/ng.2529
65. Pugh TJ, Weeraratne SD, Archer TC, Pomeranz Krummel DA, Auclair D, Bochicchio J, Carneiro MO, Carter SL, Cibulskis K, Erlich RL, Greulich H, Lawrence MS, Lennon NJ, McKenna A, Meldrim J, Ramos AH, Ross MG, Russ C, Shefler E, Sivachenko A, Sogoloff B, Stojanov P, Tamayo P, Mesirov JP, Amani V, Teider N, Sengupta S, Francois JP, Northcott PA, Taylor MD, Yu F, Crabtree GR, Kautzman AG, Gabriel SB, Getz G, Jager N, Jones DT, Lichter P, Pfister SM,

- Roberts TM, Meyerson M, Pomeroy SL, Cho YJ (2012) Medulloblastoma exome sequencing uncovers subtype-specific somatic mutations. *Nature* 488:106-110. doi:10.1038/nature11329
66. Raivio T, Avbelj M, McCabe MJ, Romero CJ, Dwyer AA, Tommiska J, Sykietis GP, Gregory LC, Diaczok D, Tziaferi V, Elting MW, Padidela R, Plummer L, Martin C, Feng B, Zhang C, Zhou QY, Chen H, Mohammadi M, Quinton R, Sidis Y, Radovick S, Dattani MT, Pitteloud N (2012) Genetic overlap in Kallmann syndrome, combined pituitary hormone deficiency, and septo-optic dysplasia. *The Journal of clinical endocrinology and metabolism* 97:E694-699. doi:10.1210/jc.2011-2938
67. Raivio T, Sidis Y, Plummer L, Chen H, Ma J, Mukherjee A, Jacobson-Dickman E, Quinton R, Van Vliet G, Lavoie H, Hughes VA, Dwyer A, Hayes FJ, Xu S, Sparks S, Kaiser UB, Mohammadi M, Pitteloud N (2009) Impaired fibroblast growth factor receptor 1 signaling as a cause of normosmic idiopathic hypogonadotropic hypogonadism. *The Journal of clinical endocrinology and metabolism* 94:4380-4390. doi:10.1210/jc.2009-0179
68. Rand V, Huang J, Stockwell T, Ferriera S, Buzko O, Levy S, Busam D, Li K, Edwards JB, Eberhart C, Murphy KM, Tsiamouri A, Beeson K, Simpson AJ, Venter JC, Riggins GJ, Strausberg RL (2005) Sequence survey of receptor tyrosine kinases reveals mutations in glioblastomas. *Proceedings of the National Academy of Sciences of the United States of America* 102:14344-14349. doi:10.1073/pnas.0507200102
69. Riley BM, Mansilla MA, Ma J, Daack-Hirsch S, Maher BS, Raffensperger LM, Russo ET, Vieira AR, Dode C, Mohammadi M, Marazita ML, Murray JC (2007) Impaired FGF signaling contributes to cleft lip and palate. *Proceedings of the National Academy of Sciences of the United States of America* 104:4512-4517. doi:10.1073/pnas.0607956104
70. Roberts KG, Li Y, Payne-Turner D, Harvey RC, Yang YL, Pei D, McCastlain K, Ding L, Lu C, Song G, Ma J, Becksfort J, Rusch M, Chen SC, Easton J, Cheng J, Boggs K, Santiago-Morales N, Iacobucci I, Fulton RS, Wen J, Valentine M, Cheng C, Paugh SW, Devidas M, Chen IM, Reshmi S, Smith A, Hedlund E, Gupta P, Nagahawatte P, Wu G, Chen X, Yergeau D, Vadodaria B, Mulder H, Winick NJ, Larsen EC, Carroll WL, Heerema NA, Carroll AJ, Grayson G, Tasian SK, Moore AS,

- Keller F, Frei-Jones M, Whitlock JA, Raetz EA, White DL, Hughes TP, Guidry Auvil JM, Smith MA, Marcucci G, Bloomfield CD, Mrozek K, Kohlschmidt J, Stock W, Kornblau SM, Konopleva M, Paietta E, Pui CH, Jeha S, Relling MV, Evans WE, Gerhard DS, Gastier-Foster JM, Mardis E, Wilson RK, Loh ML, Downing JR, Hunger SP, Willman CL, Zhang J, Mullighan CG (2014) Targetable kinase-activating lesions in Ph-like acute lymphoblastic leukemia. *The New England journal of medicine* 371:1005-1015. doi:10.1056/NEJMoa1403088
71. Roscioli T, Flanagan S, Kumar P, Masel J, Gattas M, Hyland VJ, Glass IA (2000) Clinical findings in a patient with FGFR1 P252R mutation and comparison with the literature. *Am J Med Genet* 93:22-28
72. Ross JS, Wang K, Al-Rohil RN, Nazeer T, Sheehan CE, Otto GA, He J, Palmer G, Yelensky R, Lipson D, Ali S, Balasubramanian S, Curran JA, Garcia L, Mahoney K, Downing SR, Hawryluk M, Miller VA, Stephens PJ (2014) Advanced urothelial carcinoma: next-generation sequencing reveals diverse genomic alterations and targets of therapy. *Modern pathology : an official journal of the United States and Canadian Academy of Pathology, Inc* 27:271-280. doi:10.1038/modpathol.2013.135
73. Sarfati J, Guiochon-Mantel A, Rondard P, Arnulf I, Garcia-Pinero A, Wolczynski S, Brailly-Tabard S, Bidet M, Ramos-Arroyo M, Mathieu M, Lienhardt-Roussie A, Morgan G, Turki Z, Bremont C, Lespinasse J, Du Boullay H, Chabbert-Buffet N, Jacquemont S, Reach G, De Talence N, Tonella P, Conrad B, Despert F, Delobel B, Brue T, Bouvattier C, Cabrol S, Pugeat M, Murat A, Bouchard P, Hardelin JP, Dode C, Young J (2010) A comparative phenotypic study of kallmann syndrome patients carrying monoallelic and biallelic mutations in the prokineticin 2 or prokineticin receptor 2 genes. *The Journal of clinical endocrinology and metabolism* 95:659-669. doi:10.1210/jc.2009-0843
74. Sato N, Hasegawa T, Hori N, Fukami M, Yoshimura Y, Ogata T (2005) Gonadotrophin therapy in Kallmann syndrome caused by heterozygous mutations of the gene for fibroblast growth factor

receptor 1: report of three families: case report. *Hum Reprod* 20:2173-2178.

doi:10.1093/humrep/dei052

75. Sato N, Katsumata N, Kagami M, Hasegawa T, Hori N, Kawakita S, Minowada S, Shimotsuka A, Shishiba Y, Yokozawa M, Yasuda T, Nagasaki K, Hasegawa D, Hasegawa Y, Tachibana K, Naiki Y, Horikawa R, Tanaka T, Ogata T (2004) Clinical assessment and mutation analysis of Kallmann syndrome 1 (KAL1) and fibroblast growth factor receptor 1 (FGFR1, or KAL2) in five families and 18 sporadic patients. *The Journal of clinical endocrinology and metabolism* 89:1079-1088.  
doi:10.1210/jc.2003-030476
76. Sato N, Ohyama K, Fukami M, Okada M, Ogata T (2006) Kallmann syndrome: somatic and germline mutations of the fibroblast growth factor receptor 1 gene in a mother and the son. *The Journal of clinical endocrinology and metabolism* 91:1415-1418. doi:10.1210/jc.2005-2266
77. Schwartzenuber J, Korshunov A, Liu XY, Jones DT, Pfaff E, Jacob K, Sturm D, Fontebasso AM, Quang DA, Tonjes M, Hovestadt V, Albrecht S, Kool M, Nantel A, Konermann C, Lindroth A, Jager N, Rausch T, Ryzhova M, Korbel JO, Hielscher T, Hauser P, Garami M, Klekner A, Bogner L, Ebinger M, Schuhmann MU, Scheurlen W, Pekrun A, Fruhwald MC, Roggendorf W, Kramm C, Durken M, Atkinson J, Lepage P, Montpetit A, Zakrzewska M, Zakrzewski K, Liberski PP, Dong Z, Siegel P, Kulozik AE, Zapatka M, Guha A, Malkin D, Felsberg J, Reifenberger G, von Deimling A, Ichimura K, Collins VP, Witt H, Milde T, Witt O, Zhang C, Castelo-Branco P, Lichter P, Faury D, Tabori U, Plass C, Majewski J, Pfister SM, Jabado N (2012) Driver mutations in histone H3.3 and chromatin remodelling genes in paediatric glioblastoma. *Nature* 482:226-231.  
doi:10.1038/nature10833
78. Seiwert TY, Zuo Z, Keck MK, Khattri A, Pedamallu CS, Stricker T, Brown C, Pugh TJ, Stojanov P, Cho J, Lawrence MS, Getz G, Bragelmann J, DeBoer R, Weichselbaum RR, Langerman A, Portugal L, Blair E, Stenson K, Lingen MW, Cohen EE, Vokes EE, White KP, Hammerman PS (2015) Integrative and comparative genomic analysis of HPV-positive and HPV-negative head and

- neck squamous cell carcinomas. *Clinical cancer research: an official journal of the American Association for Cancer Research* 21:632-641. doi:10.1158/1078-0432.CCR-13-3310
79. Seminara SB, Beranova M, Oliveira LM, Martin KA, Crowley WF, Jr., Hall JE (2000) Successful use of pulsatile gonadotropin-releasing hormone (GnRH) for ovulation induction and pregnancy in a patient with GnRH receptor mutations. *The Journal of clinical endocrinology and metabolism* 85:556-562. doi:10.1210/jcem.85.2.6357
80. Seo JS, Ju YS, Lee WC, Shin JY, Lee JK, Bleazard T, Lee J, Jung YJ, Kim JO, Shin JY, Yu SB, Kim J, Lee ER, Kang CH, Park IK, Rhee H, Lee SH, Kim JI, Kang JH, Kim YT (2012) The transcriptional landscape and mutational profile of lung adenocarcinoma. *Genome research* 22:2109-2119. doi:10.1101/gr.145144.112
81. Seshagiri S, Stawiski EW, Durinck S, Modrusan Z, Storm EE, Conboy CB, Chaudhuri S, Guan Y, Janakiraman V, Jaiswal BS, Guillory J, Ha C, Dijkgraaf GJ, Stinson J, Gnad F, Huntley MA, Degenhardt JD, Haverty PM, Bourgon R, Wang W, Koeppen H, Gentleman R, Starr TK, Zhang Z, Largaespada DA, Wu TD, de Sauvage FJ (2012) Recurrent R-spondin fusions in colon cancer. *Nature* 488:660-664. doi:10.1038/nature11282
82. Shaw ND, Seminara SB, Welt CK, Au MG, Plummer L, Hughes VA, Dwyer AA, Martin KA, Quinton R, Mericq V, Merino PM, Gusella JF, Crowley WF, Jr., Pitteloud N, Hall JE (2011) Expanding the phenotype and genotype of female GnRH deficiency. *The Journal of clinical endocrinology and metabolism* 96:E566-576. doi:10.1210/jc.2010-2292
83. Sidhoum VF, Chan YM, Lippincott MF, Balasubramanian R, Quinton R, Plummer L, Dwyer A, Pitteloud N, Hayes FJ, Hall JE, Martin KA, Boepple PA, Seminara SB (2014) Reversal and relapse of hypogonadotropic hypogonadism: resilience and fragility of the reproductive neuroendocrine system. *The Journal of clinical endocrinology and metabolism* 99:861-870. doi:10.1210/jc.2013-2809
84. Simonis N, Migeotte I, Lambert N, Perazzolo C, de Silva DC, Dimitrov B, Heinrichs C, Janssens S, Kerr B, Mortier G, Van Vliet G, Lepage P, Casimir G, Abramowicz M, Smits G, Vilain C (2013)



- FGFR1 mutations cause Hartsfield syndrome, the unique association of holoprosencephaly and ectrodactyly. *J Med Genet* 50:585-592. doi:10.1136/jmedgenet-2013-101603
85. Stephens P, Edkins S, Davies H, Greenman C, Cox C, Hunter C, Bignell G, Teague J, Smith R, Stevens C, O'Meara S, Parker A, Tarpey P, Avis T, Barthorpe A, Brackenbury L, Buck G, Butler A, Clements J, Cole J, Dicks E, Edwards K, Forbes S, Gorton M, Gray K, Halliday K, Harrison R, Hills K, Hinton J, Jones D, Kosmidou V, Laman R, Lugg R, Menzies A, Perry J, Petty R, Raine K, Shepherd R, Small A, Solomon H, Stephens Y, Tofts C, Varian J, Webb A, West S, Widaa S, Yates A, Brasseur F, Cooper CS, Flanagan AM, Green A, Knowles M, Leung SY, Looijenga LH, Malkowicz B, Pierotti MA, Teh B, Yuen ST, Nicholson AG, Lakhani S, Easton DF, Weber BL, Stratton MR, Futreal PA, Wooster R (2005) A screen of the complete protein kinase gene family identifies diverse patterns of somatic mutations in human breast cancer. *Nature genetics* 37:590-592. doi:10.1038/ng1571
86. Stransky N, Egloff AM, Tward AD, Kostic AD, Cibulskis K, Sivachenko A, Kryukov GV, Lawrence MS, Sougnez C, McKenna A, Shefler E, Ramos AH, Stojanov P, Carter SL, Voet D, Cortes ML, Auclair D, Berger MF, Saksena G, Guiducci C, Onofrio RC, Parkin M, Romkes M, Weissfeld JL, Seethala RR, Wang L, Rangel-Escareno C, Fernandez-Lopez JC, Hidalgo-Miranda A, Melendez-Zajgla J, Winckler W, Ardlie K, Gabriel SB, Meyerson M, Lander ES, Getz G, Golub TR, Garraway LA, Grandis JR (2011) The mutational landscape of head and neck squamous cell carcinoma. *Science* 333:1157-1160. doi:10.1126/science.1208130
87. Sykiotis GP, Plummer L, Hughes VA, Au M, Durrani S, Nayak-Young S, Dwyer AA, Quinton R, Hall JE, Gusella JF, Seminara SB, Crowley WF, Jr., Pitteloud N (2010) Oligogenic basis of isolated gonadotropin-releasing hormone deficiency. *Proceedings of the National Academy of Sciences of the United States of America* 107:15140-15144. doi:10.1073/pnas.1009622107
88. Tahara T, Yamamoto E, Madireddi P, Suzuki H, Maruyama R, Chung W, Garriga J, Jelinek J, Yamano HO, Sugai T, Kondo Y, Toyota M, Issa JP, Estecio MR (2014) Colorectal carcinomas with

CpG island methylator phenotype 1 frequently contain mutations in chromatin regulators.

*Gastroenterology* 146:530-538 e535. doi:10.1053/j.gastro.2013.10.060

89. Taylor BS, Schultz N, Hieronymus H, Gopalan A, Xiao Y, Carver BS, Arora VK, Kaushik P, Cerami E, Reva B, Antipin Y, Mitsiades N, Landers T, Dolgalev I, Major JE, Wilson M, Socci ND, Lash AE, Heguy A, Eastham JA, Scher HI, Reuter VE, Scardino PT, Sander C, Sawyers CL, Gerald WL (2010) Integrative genomic profiling of human prostate cancer. *Cancer cell* 18:11-22. doi:10.1016/j.ccr.2010.05.026
90. Trarbach EB, Costa EM, Versiani B, de Castro M, Baptista MT, Garmes HM, de Mendonca BB, Latronico AC (2006) Novel fibroblast growth factor receptor 1 mutations in patients with congenital hypogonadotropic hypogonadism with and without anosmia. *The Journal of clinical endocrinology and metabolism* 91:4006-4012. doi:10.1210/jc.2005-2793
91. Trarbach EB, Teles MG, Costa EM, Abreu AP, Garmes HM, Guerra G, Jr., Baptista MT, de Castro M, Mendonca BB, Latronico AC (2010) Screening of autosomal gene deletions in patients with hypogonadotropic hypogonadism using multiplex ligation-dependent probe amplification: detection of a hemizygosia for the fibroblast growth factor receptor 1. *Clin Endocrinol (Oxf)* 72:371-376. doi:10.1111/j.1365-2265.2009.03642.x
92. Vilain C, Mortier G, Van Vliet G, Dubourg C, Heinrichs C, de Silva D, Verloes A, Baumann C (2009) Hartsfield holoprosencephaly-ectrodactyly syndrome in five male patients: further delineation and review. *Am J Med Genet A* 149A:1476-1481. doi:10.1002/ajmg.a.32678
93. Villanueva C, Jacobson-Dickman E, Xu C, Manouvrier S, Dwyer AA, Sykiotis GP, Beenken A, Liu Y, Tommiska J, Hu Y, Tiosano D, Gerard M, Leger J, Drouin-Garraud V, Lefebvre H, Polak M, Carel JC, Phan-Hug F, Hauschild M, Plummer L, Rey JP, Raivio T, Bouloux P, Sidis Y, Mohammadi M, de Roux N, Pitteloud N (2015) Congenital hypogonadotropic hypogonadism with split hand/foot malformation: a clinical entity with a high frequency of FGFR1 mutations. *Genet Med* 17:651-659. doi:10.1038/gim.2014.166

94. Wang K, Li M, Hakonarson H (2010) ANNOVAR: functional annotation of genetic variants from high-throughput sequencing data. *Nucleic acids research* 38:e164. doi:10.1093/nar/gkq603
95. Wang K, Yuen ST, Xu J, Lee SP, Yan HH, Shi ST, Siu HC, Deng S, Chu KM, Law S, Chan KH, Chan AS, Tsui WY, Ho SL, Chan AK, Man JL, Foglizzo V, Ng MK, Chan AS, Ching YP, Cheng GH, Xie T, Fernandez J, Li VS, Clevers H, Rejto PA, Mao M, Leung SY (2014) Whole-genome sequencing and comprehensive molecular profiling identify new driver mutations in gastric cancer. *Nature genetics* 46:573-582. doi:10.1038/ng.2983
96. Weng AP, Ferrando AA, Lee W, Morris JPt, Silverman LB, Sanchez-Irizarry C, Blacklow SC, Look AT, Aster JC (2004) Activating mutations of NOTCH1 in human T cell acute lymphoblastic leukemia. *Science* 306:269-271. doi:10.1126/science.1102160
97. White KE, Cabral JM, Davis SI, Fishburn T, Evans WE, Ichikawa S, Fields J, Yu X, Shaw NJ, McLellan NJ, McKeown C, Fitzpatrick D, Yu K, Ornitz DM, Econs MJ (2005) Mutations that cause osteoglophonic dysplasia define novel roles for FGFR1 in bone elongation. *American journal of human genetics* 76:361-367. doi:10.1086/427956
98. Wu G, Diaz AK, Paugh BS, Rankin SL, Ju B, Li Y, Zhu X, Qu C, Chen X, Zhang J, Easton J, Edmonson M, Ma X, Lu C, Nagahawatte P, Hedlund E, Rusch M, Pounds S, Lin T, Onar-Thomas A, Huether R, Kriwacki R, Parker M, Gupta P, Becksfort J, Wei L, Mulder HL, Boggs K, Vadodaria B, Yergeau D, Russell JC, Ochoa K, Fulton RS, Fulton LL, Jones C, Boop FA, Broniscer A, Wetmore C, Gajjar A, Ding L, Mardis ER, Wilson RK, Taylor MR, Downing JR, Ellison DW, Zhang J, Baker SJ, St. Jude Children's Research Hospital-Washington University Pediatric Cancer Genome P (2014) The genomic landscape of diffuse intrinsic pontine glioma and pediatric non-brainstem high-grade glioma. *Nature genetics* 46:444-450. doi:10.1038/ng.2938
99. Zenaty D, Bretones P, Lambe C, Guemas I, David M, Leger J, de Roux N (2006) Paediatric phenotype of Kallmann syndrome due to mutations of fibroblast growth factor receptor 1 (FGFR1). *Mol Cell Endocrinol* 254-255:78-83. doi:10.1016/j.mce.2006.04.006

100. Zhang J, Grubor V, Love CL, Banerjee A, Richards KL, Mieczkowski PA, Dunphy C, Choi W, Au WY, Srivastava G, Lugar PL, Rizzieri DA, Lagoo AS, Bernal-Mizrachi L, Mann KP, Flowers C, Naresh K, Evens A, Gordon LI, Czader M, Gill JI, Hsi ED, Liu Q, Fan A, Walsh K, Jima D, Smith LL, Johnson AJ, Byrd JC, Luftig MA, Ni T, Zhu J, Chadburn A, Levy S, Dunson D, Dave SS (2013) Genetic heterogeneity of diffuse large B-cell lymphoma. *Proceedings of the National Academy of Sciences of the United States of America* 110:1398-1403.  
doi:10.1073/pnas.1205299110
101. Zhang L, Chen LH, Wan H, Yang R, Wang Z, Feng J, Yang S, Jones S, Wang S, Zhou W, Zhu H, Killela PJ, Zhang J, Wu Z, Li G, Hao S, Wang Y, Webb JB, Friedman HS, Friedman AH, McLendon RE, He Y, Reitman ZJ, Bigner DD, Yan H (2014) Exome sequencing identifies somatic gain-of-function PPM1D mutations in brainstem gliomas. *Nature genetics* 46:726-730.  
doi:10.1038/ng.2995
102. Zhang L, Zhou Y, Cheng C, Cui H, Cheng L, Kong P, Wang J, Li Y, Chen W, Song B, Wang F, Jia Z, Li L, Li Y, Yang B, Liu J, Shi R, Bi Y, Zhang Y, Wang J, Zhao Z, Hu X, Yang J, Li H, Gao Z, Chen G, Huang X, Yang X, Wan S, Chen C, Li B, Tan Y, Chen L, He M, Xie S, Li X, Zhuang X, Wang M, Xia Z, Luo L, Ma J, Dong B, Zhao J, Song Y, Ou Y, Li E, Xu L, Wang J, Xi Y, Li G, Xu E, Liang J, Yang X, Guo J, Chen X, Zhang Y, Li Q, Liu L, Li Y, Zhang X, Yang H, Lin D, Cheng X, Guo Y, Wang J, Zhan Q, Cui Y (2015) Genomic analyses reveal mutational signatures and frequently altered genes in esophageal squamous cell carcinoma. *American journal of human genetics* 96:597-611. doi:10.1016/j.ajhg.2015.02.017
